# Supplementary material for: LARP7-like protein Pof8 regulates telomerase assembly and poly(A)+TERRA expression in fission yeast
Source: PubMed Central journal article supplement (PMC5805695; doi:10.1038/s41467-018-02874-0), 2018-02-08
Supplement: 41467_2018_2874_MOESM1_ESM.pdf [file 41467_2018_2874_MOESM1_ESM.pdf]

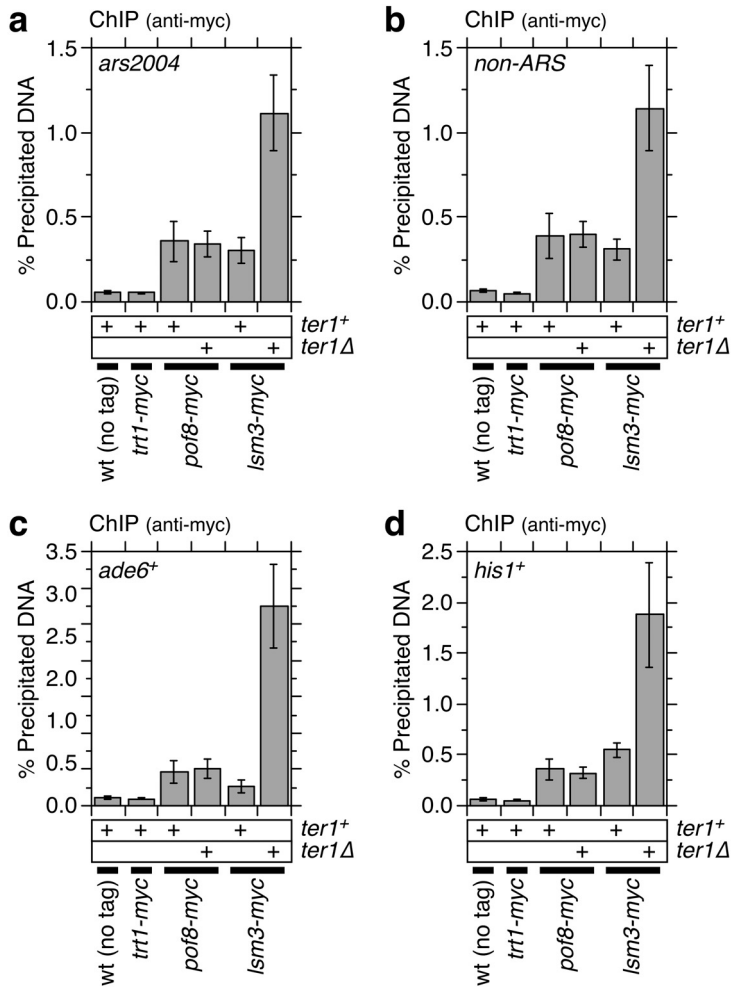

**Supplementary Figure 1** Pof8 and Lsm3 bind to non-telomeric sites.

(a-d) Quantitative real-time PCR ChIP analysis to monitor association of Trt1, Pof8 and Lsm3 in indicated genetic backgrounds at (a) *ars2004*, (b) *non-ARS*, (c) *ade6*<sup>+</sup> and (d) *his1*<sup>+</sup>. (See **Supplementary Table 4** for primers used in PCR.) Plots show mean values plus/minus SEM from at least 5 independent experiments. Raw data and statistical analysis are available in **Supplementary Dataset**.

|                       |   |                                                                                |    |
|-----------------------|---|--------------------------------------------------------------------------------|----|
| <i>S. pombe</i>       | 1 | MFVPROLVNRKIKAFGTGKNNISADGNNNKIKDEHYKH--NEASKEKSHSIS--GGLMLNQO-----DROLIEPLNPF | 70 |
| <i>S. cryophilus</i>  | 1 | MFLPROLVNRNRLTRRPSISNKTPT--VDQEHKSI--NGS-----S-T--SSTRLARS-----AFKNIINDLKP     | 58 |
| <i>S. octosporus</i>  | 1 | MFLPROLVNIRNKPKK-THSKHTP-----TDKENENT--SSS-----S-A--SLNSITIP-----GPEVNDLKP     | 57 |
| <i>S. japonicus</i>   | 1 | MFVPROLVRRRPLPSKEPVENAPP-AKEAPVDPVVEYIPIHPSRKEPKKEAPDVHTTKTAT-----QKTEKNDL     | 73 |
| <i>Saitoella</i>      | 1 | MFVPRVTKRKLPHVPAEPPRALQPISTGS-----VAAQPESSNPADTSS--KHPPRAPT--GP---VQQPKKGP     | 71 |
| <i>Pyronema</i>       | 1 | MFLPROLVKRTYTAQHPTPKSSASKNKSLV--V--SPEKPKIEPVAVAA--SSTTAAP-----TNI             | 68 |
| <i>Tuber</i>          | 1 | MFVPROLVKRSKSLCQQQK-----E--STP-----APT-----EKSXTNDYDPTL                        | 38 |
| <i>Botryobasidium</i> | 1 | MSFNFPRAKTKNGKAAASSSSV--PPNPTPI-----FTQRPV-----EGPRLTPNTKGGKELSRIAKDE          | 70 |
| <i>Termitomyces</i>   | 1 | MASSFPFIPRTLVKQKQVSOHTSQASTSAQVPSFS-----LNT-----GTPHITKAKYSNE                  | 53 |

Previously identified as a putative F-box in *S. pombe* Pof8

La-Motif?

|                       |    |                                                                     |     |
|-----------------------|----|---------------------------------------------------------------------|-----|
| <i>S. pombe</i>       | 71 | ISAVDSILEYFHR-----EROKKXVHIAFLIO--ODDFWKGII--RPNPTONNLKYALSYVNAIF   | 127 |
| <i>S. cryophilus</i>  | 59 | IRAVECMIEVLYFR-----ERETKXFLHLYLIN--KOEFWOGL--KESPTQANLKQCVKRLKNEIF  | 115 |
| <i>S. octosporus</i>  | 58 | IRAVECMIEVLYFR-----ERKXKXFLHLSYLIN--KOEFWOGL--RMSPTQANLKQCVKTKMNEIF | 114 |
| <i>S. japonicus</i>   | 74 | QDTVLSAVELQPMK-----NPDQDNFHLSLTLDDDEQKVASV--KEPAPQKTKSALKASKSSFF    | 132 |
| <i>Saitoella</i>      | 72 | AWKHVAVLEMLAPSS-----SVRFAAKST-----DGSSGVIHLSHIHS--HRSISNL--RPS      | 138 |
| <i>Pyronema</i>       | 69 | AEAVVYVLPQLSS-----ENPWTEWLDARRREI-----DGHYVHIAAVIE--CPYKEH--R       | 139 |
| <i>Tuber</i>          | 39 | AKEMVMTLELISDGHGIESGPPWEFSARMSV-----EGSDFIHLIHALD--CPLLAEM--        | 112 |
| <i>Botryobasidium</i> | 71 | LATLLELISDSY-----AFWSAHLQAVS-----TSKDGQVPLRRLN--ESVSAHIPO           | 139 |
| <i>Termitomyces</i>   | 54 | YLNIFNLALSDY-----ALWVDPDLRIIDFSTESSSNEQDGFPLSRLLR--RSKVLGPLNI       | 130 |

La-Motif?

|                       |     |                                                                   |     |
|-----------------------|-----|-------------------------------------------------------------------|-----|
| <i>S. pombe</i>       | 128 | HF-----DNSSHMVIRNEENVL-----PLDIPLYDRITIVVEVPATLSNKSLE--LAGLGRKY   | 178 |
| <i>S. cryophilus</i>  | 116 | TF-----DEESHSTIRNEYK-L-----DPNEDLFRIVYVEPFPATLSNKPFFM--LAGLLREC   | 165 |
| <i>S. octosporus</i>  | 115 | TF-----DEGSHFIRKNEK-F-----DFNEDLFRIVYVEPFPATLSNKPFFM--LAGLLREC    | 164 |
| <i>S. japonicus</i>   | 133 | SF-----DENDFHVRNEAFPS-----RPTSMFDRIVYVESFPATMSAKPMH--LLGVLRPV     | 183 |
| <i>Saitoella</i>      | 139 | ET-----SADGVHVRORLPFN-----PLICTDDEMTIVVEVPKATDDALD--VAVALRKE      | 189 |
| <i>Pyronema</i>       | 140 | QT-----SODGVHRLSSST-----PRIPIEDSHTIYVEPVSVAATTPG--RUAL--ELH       | 187 |
| <i>Tuber</i>          | 113 | QT-----SKKRVYIRRRQEYLASSRSPAGHKCSSESTIYIEPHVTCITL-NPC--RVARMLSO   | 168 |
| <i>Botryobasidium</i> | 140 | EVRIILFTEPSQGDWNPDAQMESEQGDAGGYEIRKQWHSIKD-AHPLWGTAWEGRITIVVENMPP | 228 |
| <i>Termitomyces</i>   | 131 | EVRLLVSEPPSSSAWSGKR-----DTARDIGAYVRRRETQA-RP-SRTYSRQDWEVRTVYVES   | 212 |

La-Motif?

RRM1

|                       |     |                                                                 |     |
|-----------------------|-----|-----------------------------------------------------------------|-----|
| <i>S. pombe</i>       | 179 | -----LKEFLFYVDALGTPGYAFVILYKKVDSATSK-IPV-----PPGVLLLRKBEWT      | 217 |
| <i>S. cryophilus</i>  | 166 | -----FSGFLYLDIIPPEGYAFVVLASISOETLS-LVI-----POGMNLSREBEWT        | 224 |
| <i>S. octosporus</i>  | 165 | -----FSGFLYLDVIPPEGYAFVVLQASISOETLS-LVV-----POGKLLSREBEWT       | 213 |
| <i>S. japonicus</i>   | 184 | -----MRQWLPFTRKISTPEGYAFVECKSVQEQDNNH-VOA-----PSCFTLLSRAEWT     | 232 |
| <i>Saitoella</i>      | 190 | -----MSAEDPCLFIQVFLGRGYAVLILSSIVDESTVKN-LKM-----BMTVMVLRKBEWT   | 241 |
| <i>Pyronema</i>       | 188 | -----KTLPAELLPVYVTTNEHRSVALTISAPVQEQDNNHESW-----POGMNLSRBEWT    | 240 |
| <i>Tuber</i>          | 169 | -----SAMPKRLVQVVEAGDIAFAVILSAAVSHEDEENQCLW-----PKGMNLSRBEWT     | 221 |
| <i>Botryobasidium</i> | 229 | PVPMVAVQSIITPNROSASEGNSLSEFGEIKCRGFVTFREVEHAERAVQEWPPWDTQEA     | 318 |
| <i>Termitomyces</i>   | 213 | PHAARVQGVILPPHQDKPG-----DAPITCKGFALVVFQDIDVETFLRQWPDWRHQDTDLQNP | 294 |

RRM1

RRM1-C

|                       |     |                                                                   |     |
|-----------------------|-----|-------------------------------------------------------------------|-----|
| <i>S. pombe</i>       | 228 | NREKRYFENQHLVKASSSDVSN--S-----SNS-F-----PENRYPKLTKVEKQMTKSVSKTSQ  | 301 |
| <i>S. cryophilus</i>  | 215 | KREKMYMEYQADTMKSSSSAFFT--EPIITNQS--FRITNPDRASSSVQPESSERQFPLEDDCKK | 301 |
| <i>S. octosporus</i>  | 214 | KREKMYMEYQADTMKSSSSAFFT--VPSLQNKQ-----NOAVLSSVTKQEHKHPLEALSDS     | 295 |
| <i>S. japonicus</i>   | 233 | LRREEMIDICIVGDSKRATORLQO--SQARRNOGALVRNSNLSPSPDPTK-----PSPHHE     | 305 |
| <i>Saitoella</i>      | 242 | RRDVEVORLIQSDYDALRRRRVSPERRREEGRLT-----PPREVGRITPPPLPS--LPPK      | 320 |
| <i>Pyronema</i>       | 241 | KRDAMKQKRHEATQ-----ARL--A-----S--HHVREMANAPPYIP-----KHTPE         | 290 |
| <i>Tuber</i>          | 222 | KRDEVEOHLRCRRPTSPARIRL--P--ERHDGASG-----SSVQMQWSDLPFIPFPVDP       | 298 |
| <i>Botryobasidium</i> | 319 | ALKBEMLAYQHLIDLKSKPTASDPPEVVRSSOP--IPNSNQ-----PPPLIH--H-----      | 387 |
| <i>Termitomyces</i>   | 295 | RLKDBVLSYRRELVAEINAFODATERPVP-TLP--VNPKA-----ETAITN--HAAPAPLE     | 368 |

RRM1-C

xRRM2

|                       |     |                                                            |     |
|-----------------------|-----|------------------------------------------------------------|-----|
| <i>S. pombe</i>       | 302 | PLTNKSTIHSLLSYVFSRQTO-----NIACEPMYIDYRKDETEAIIIRWKTPLHAETC | 370 |
| <i>S. cryophilus</i>  | 302 | PLTNKSTIQSLLRYVFSRONP-----TATCEPMYIDYRKDETEAIVRWKSPBOALICV | 370 |
| <i>S. octosporus</i>  | 296 | RLTNKSTIQSLLHYVFSRODP-----TATCEPMYIDYRKDETEAIVRWKSEOASTC   | 364 |
| <i>S. japonicus</i>   | 306 | PLTNKSNLQAFVHMKOAKO-----DNCVI-QYIDYRKDEVEAIVRWKYADOASTC    | 373 |
| <i>Saitoella</i>      | 321 | EETNKPTIQSFLAQVANROCYFDKNPSAQLEYDGAPIEDATDTNLVHVQYVDYTRPSD | 410 |
| <i>Pyronema</i>       | 291 | LDATKPSISGFMRCVDRVQRKRDKADG-----KPEAIPQVVKINYYIDYKGTGCYLR  | 371 |
| <i>Tuber</i>          | 299 | PLTNKSTIHSLLSYVFSRQTO-----K--DRDGPPVNIYVYDYSKGLTAYLRKAQD   | 378 |
| <i>Botryobasidium</i> | 388 | PLTNKSTIHSLLSYVFSRQTO-----K--DRDGPPVNIYVYDYSKGLTAYLRKAQD   | 452 |
| <i>Termitomyces</i>   | 369 | PLTNKSTIHSLLSYVFSRQTO-----VNSDGDYVDYDNRGMDSCHLRLATPE       | 437 |

Y330

R343

xRRM2

|                       |     |                                                            |     |
|-----------------------|-----|------------------------------------------------------------|-----|
| <i>S. pombe</i>       | 371 | RAHRKKGSS--RPFLLAELITGEEBEKNYWRMKK                         | 402 |
| <i>S. cryophilus</i>  | 371 | RAHRKHNKQ--GPFISAELEGESEESYWNLIYQKVKI                      | 406 |
| <i>S. octosporus</i>  | 365 | RAHRKHKDK--GPFISAELEGESEESYWNLIYQKVKI                      | 400 |
| <i>S. japonicus</i>   | 374 | VGIRT--A--SEFVDAELIACSEASWOLIPPKR                          | 405 |
| <i>Saitoella</i>      | 411 | KGTISVGENS--ERKYVGVNLEGERERYWMEDEAKTIGKRRK--AGDQDRSRAVES-- | 485 |
| <i>Pyronema</i>       | 372 | KGKRE--KDCYVQGRLEGESEESYWNLIYQKVKI                         | 455 |
| <i>Tuber</i>          | 379 | KGKRVINDSGRDMVVKATINVEGNEERIYV                             | 407 |
| <i>Botryobasidium</i> | 453 | EGRVA--SGDERPIIAEIVDGKREELVYRVEPKVRR--ESVLKARIGAGGHDA--    | 523 |
| <i>Termitomyces</i>   | 438 | TCKPS--DGTSPPVLMELVPCREQLVYRVEPKVRR--QAVQKALASVDASALNVGNGR | 514 |

xRRM2

**Supplementary Figure 2** Sequence alignment of fungal Pof8-like proteins.

Proteins that show homology to fission yeast Pof8 were initially identified by PSH-BLAST (Position-Specific Iterated BLAST) at NCBI (<https://blast.ncbi.nlm.nih.gov/Blast.cgi>) after 3rd iterations using *S. pombe* Pof8 sequence. (Accession numbers for fungal Pof8-like proteins used in alignment are listed in **Supplementary Table 5**.) Multiple sequence alignment was generated by Clustal Omega<sup>1</sup>. Highly conserved residues within the xRRM domain that have been implicated in RNA recognition<sup>2-4</sup> are highlighted with colored background. Amino acid residues that show at least 50% conservation among aligned sequences are highlighted in black (identical residues) or gray (similar residues, grouped as GAVLI, FYW, CM, ST, KRH, DENQ, and P). Regions corresponding to putative La-motif, RRM1 and xRRM2 are marked. In addition, the region previously suggested to correspond to F-box in *S. pombe* Pof8<sup>5</sup> is indicated.

a

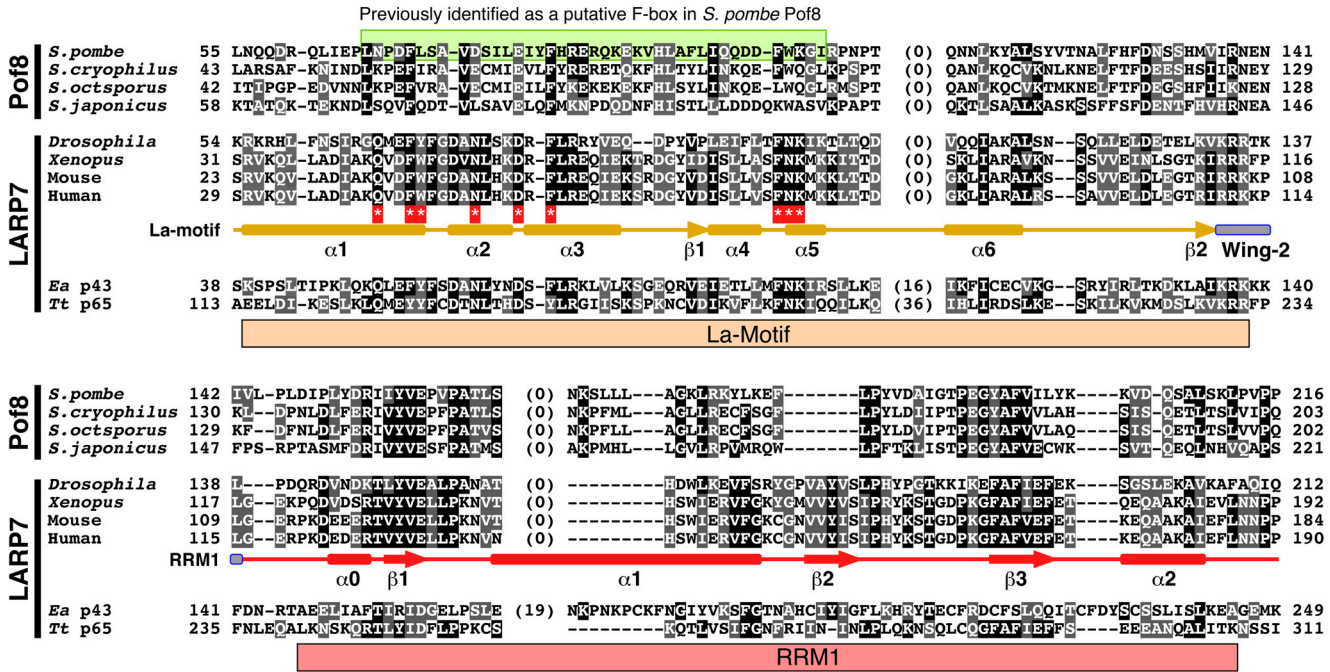

b

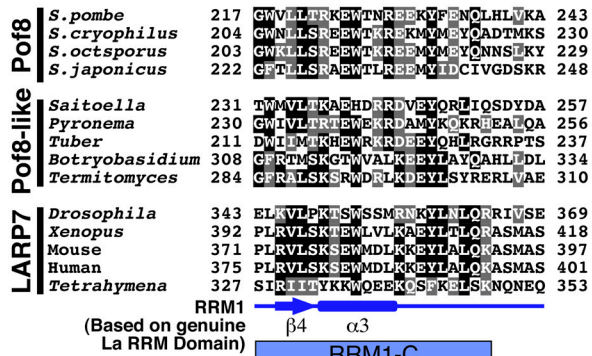

### Supplementary Figure 3 Sequence alignment for the N-terminal region of Pof8 and LARP7 family proteins.

(a) Sequence alignment of N-terminal regions that correspond to La-motif and RRM1 motif from Pof8 proteins from *Schizosaccharomyces* species (*S. pombe*, *S. cryophilus*, *S. octosporus*, and *S. japonicus*), LARP7 proteins (*Drosophila*, *Xenopus*, mouse, and human), *Euplotes* p43, and *Tetrahymena* p65. Residues within the La-motif that are important for recognition of poly(U) sequence in human LARP7<sup>6</sup> are indicated with red colored square with Asterisk (\*) mark. Amino acid residues that show at least 50% conservation among aligned sequences are highlighted in black (identical residues) or gray. The secondary structures for the human LARP7<sup>6</sup> La-motif and RRM1, and the putative F-box in *S. pombe* Pof8<sup>5</sup> are also indicated. (b) Alignment for additional region of homology C-terminal to RRM1 (RRM-C) among fission yeast Pof8, fungal Pof8-like proteins, and LARP7 family proteins from indicated species. This region of mammalian LARP7 has previously been identified to show homology to the  $\alpha 3$  helix region of RRM1 in genuine La proteins<sup>6</sup>. The secondary structure of a genuine La protein for this region is also indicated.

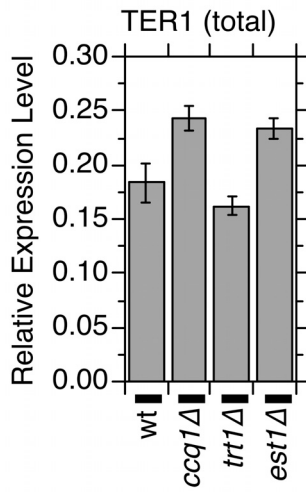

**Supplementary Figure 4** TER1 RNA expression in *ccq1*Δ, *trt1*Δ, and *est1*Δ cells. TER1 RNA expression levels were normalized to *his1*<sup>+</sup> mRNA expression. Error bars correspond to SEM from at least 3 independent experiments, and raw data and statistical analysis are available in **Supplementary Dataset**.

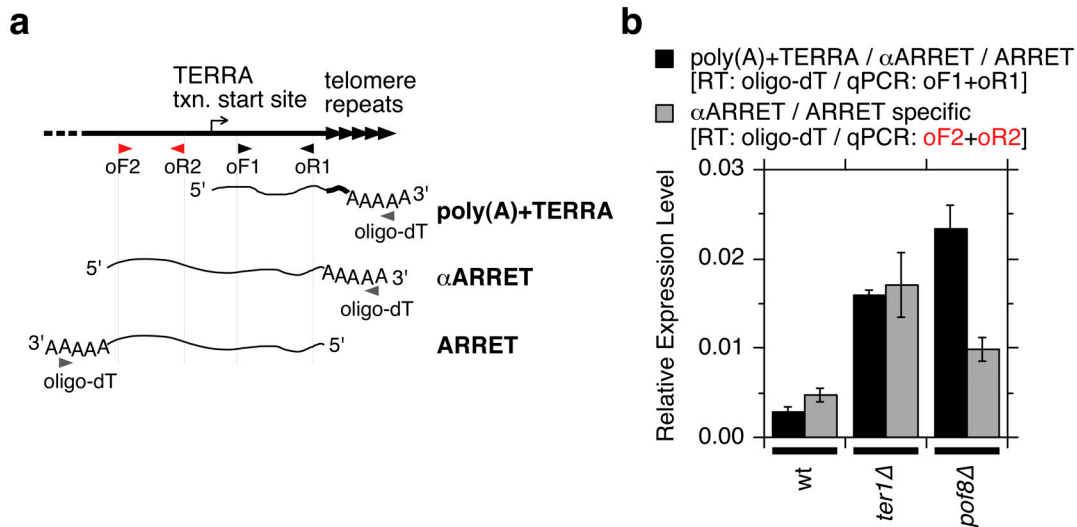

**Supplementary Figure 5** Effect of *pof8Δ* on ARRET/αARRET expression.

(a) A schematic diagram indicating various poly(A)-tailed lncRNA species expressed at fission yeast telomere/sub-telomere regions<sup>7,8</sup>. Locations of primers used in RT reaction (oligo-dT) and subsequent quantitative PCR analysis (oF2 and oR2) to specifically monitor ARRET and αARRET, but not poly(A)+TERRA are indicated, along with primers that potentially detect all three type of poly(A)-tailed lncRNAs (oF1 and oR1) (**Supplementary Table 4**). (b) Expression levels of ARRET/αARRET is not greatly affected by *pof8Δ* mutation. Expression levels of telomeric transcripts were normalized to *his1<sup>+</sup>* mRNA. Error bars correspond to SEM from at least 5 independent experiments. Raw data and statistical analysis are available in **Supplementary Dataset**.



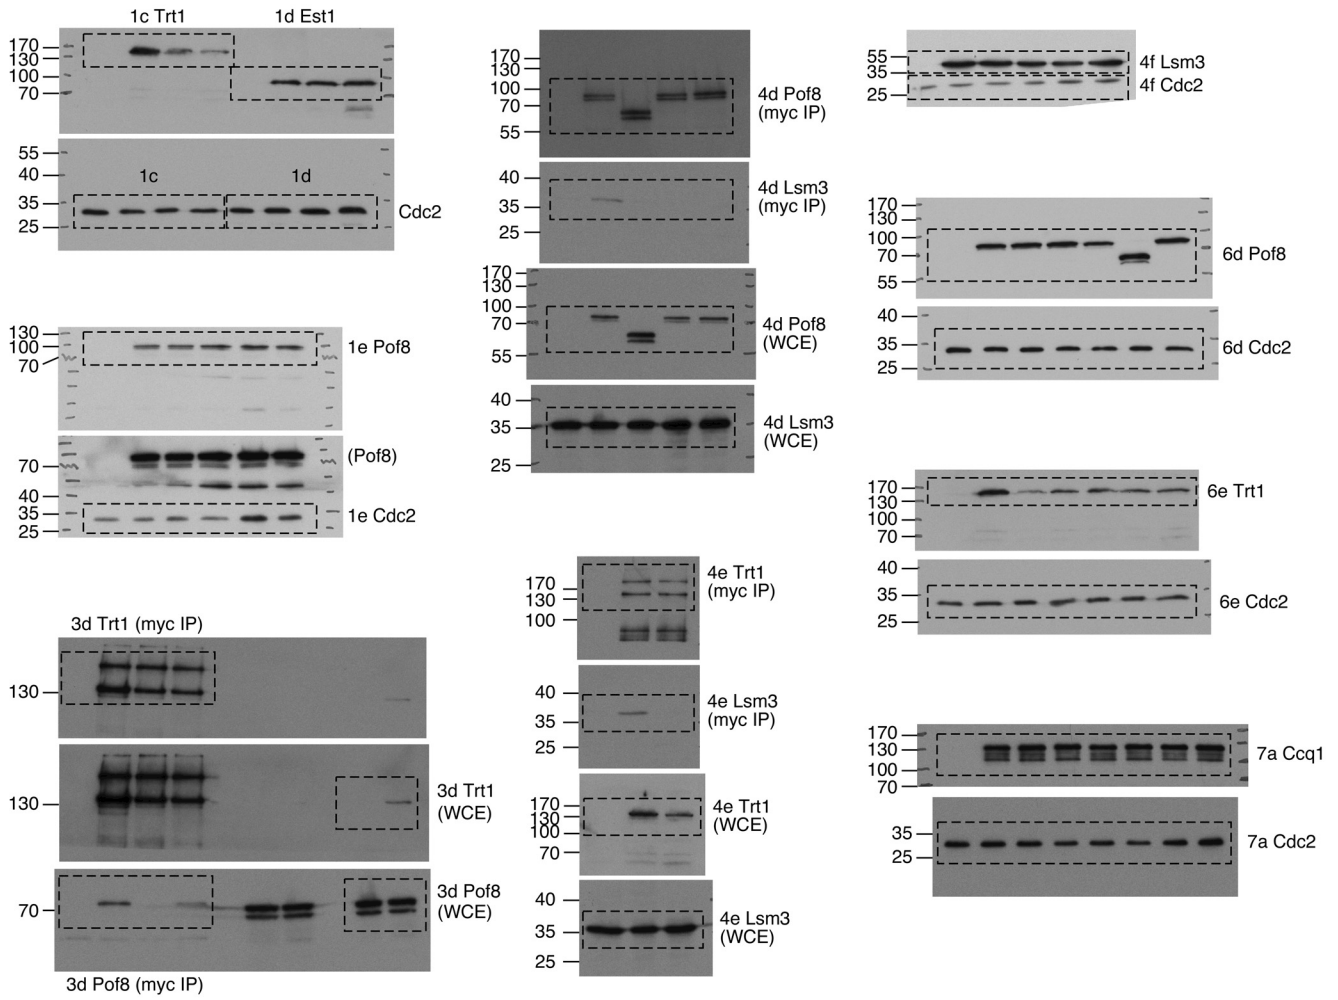

**Supplementary Figure 6:** Uncropped western blot gels for indicated main figures. Areas of gels shown in main figures are marked with dashed boxes. Sizes of protein molecular weight markers (kDa) are also indicated.

**Supplementary Table 1:** Fission yeast strains used in this study.

| Figure  | Strain                | Full Genotype                                                                                            |                                                                                                           |
|---------|-----------------------|----------------------------------------------------------------------------------------------------------|-----------------------------------------------------------------------------------------------------------|
| 1a      | TN2411                | wt                                                                                                       | <i>h- leu1-32 ura4-D18 his3-D1</i>                                                                        |
|         | TN12119               | <i>pof8Δ</i>                                                                                             | <i>h+ leu1-32 ura4-D18 his3-D1 pof8Δ::kanMX6</i>                                                          |
|         | AM17672               | <i>pof8Δ trt1Δ</i>                                                                                       | <i>h- leu1-32 ura4-D18 his3-D1 trt1-2::his3<sup>+</sup> pof8Δ::kanMX6</i>                                 |
|         | TN17261               | <i>pof8Δ rad52Δ<sup>+</sup></i>                                                                          | <i>h- leu1-32 ura4-D18 his3-D1 rad52Δ-D2::LEU2 pof8Δ::kanMX6</i>                                          |
| 1b      | TN2411                | wt                                                                                                       | <i>h- leu1-32 ura4-D18 his3-D1</i>                                                                        |
|         | TN12119               | <i>pof8Δ</i>                                                                                             | <i>h+ leu1-32 ura4-D18 his3-D1 pof8Δ::kanMX6</i>                                                          |
|         | AG14003               | <i>taz1Δ</i>                                                                                             | <i>h- leu1-32 ura4-D18 ade6-M210 his3-D1 taz1-2::ura4<sup>+</sup></i>                                     |
|         | AM17697               | <i>pof8Δ taz1Δ</i>                                                                                       | <i>h- leu1-32 ura4-D18 his3-D1 taz1-2::ura4<sup>+</sup> pof8Δ::kanMX6</i>                                 |
|         | YTC9370               | <i>rap1Δ</i>                                                                                             | <i>h+ leu1-32 ura4-D18 his3-D1 rap1::ura4<sup>+</sup></i>                                                 |
|         | AM17700               | <i>pof8Δ rap1Δ</i>                                                                                       | <i>h- leu1-32 ura4-D18 his3-D1 rap1::ura4<sup>+</sup> pof8Δ::kanMX6</i>                                   |
|         | YTC8555               | <i>poz1Δ</i>                                                                                             | <i>h+ leu1-32 ura4-D18 his3-D1 poz1::natMX6</i>                                                           |
|         | AM17701               | <i>pof8Δ poz1Δ</i>                                                                                       | <i>h- leu1-32 ura4-D18 his3-D1 poz1::natMX6 pof8Δ::kanMX6</i>                                             |
|         | YTC8432               | <i>rif1Δ</i>                                                                                             | <i>h+ leu1-32 ura4-D18 his3-D1 rif1Δ::ura4<sup>+</sup></i>                                                |
|         | AM17695               | <i>pof8Δ rif1Δ</i>                                                                                       | <i>h- leu1-32 ura4-D18 his3-D1 rif1Δ::ura4<sup>+</sup> pof8Δ::kanMX6</i>                                  |
| TN12119 | <i>pof8Δ</i>          | <i>h+ leu1-32 ura4-D18 his3-D1 pof8Δ::kanMX6</i>                                                         |                                                                                                           |
| 1c      | TN2411                | <i>trt1<sup>+</sup></i> (no tag)                                                                         | <i>h- leu1-32 ura4-D18 his3-D1</i>                                                                        |
|         | TN10695               | <i>trt1-myc</i>                                                                                          | <i>h- leu1-32 ura4-D18 his3-D1 trt1<sup>+</sup>::G8-13myc-natMX6</i>                                      |
|         | TN10696               | <i>trt1-myc</i>                                                                                          | <i>h- leu1-32 ura4-D18 his3-D1 trt1<sup>+</sup>::G8-13myc-natMX6</i>                                      |
|         | TN16187               | <i>trt1-myc pof8Δ</i>                                                                                    | <i>h- leu1-32 ura4-D18 his3-D1 trt1<sup>+</sup>::G8-13myc-natMX6 pof8Δ::kanMX6</i>                        |
|         | TN16188               | <i>trt1-myc pof8Δ</i>                                                                                    | <i>h- leu1-32 ura4-D18 his3-D1 trt1<sup>+</sup>::G8-13myc-natMX6 pof8Δ::kanMX6</i>                        |
|         | TN16189               | <i>trt1-myc pof8Δ</i>                                                                                    | <i>h- leu1-32 ura4-D18 his3-D1 trt1<sup>+</sup>::G8-13myc-natMX6 pof8Δ::kanMX6</i>                        |
|         | AM17632               | <i>trt1-myc ter1Δ</i>                                                                                    | <i>h+ leu1-32 ura4-D18 his3-D1 trt1<sup>+</sup>::G8-13myc-kanMX6 ter1Δ[25-1135]::ura4<sup>+</sup>-tk</i>  |
| AM17633 | <i>trt1-myc ter1Δ</i> | <i>h+ leu1-32 ura4-D18 his3-D1 trt1<sup>+</sup>::G8-13myc-kanMX6 ter1Δ[25-1135]::ura4<sup>+</sup>-tk</i> |                                                                                                           |
| 1d      | TN2411                | <i>est1<sup>+</sup></i> (no tag)                                                                         | <i>h- leu1-32 ura4-D18 his3-D1</i>                                                                        |
|         | TN17157               | <i>est1-myc</i>                                                                                          | <i>h- leu1-32 ura4-D18 his3-D1 est1<sup>+</sup>::G8-13myc-kanMX6</i>                                      |
|         | TN17158               | <i>est1-myc</i>                                                                                          | <i>h- leu1-32 ura4-D18 his3-D1 est1<sup>+</sup>::G8-13myc-kanMX6</i>                                      |
|         | TN17171               | <i>est1-myc pof8Δ</i>                                                                                    | <i>h- leu1-32 ura4-D18 his3-D1 est1<sup>+</sup>::G8-13myc-kanMX6 pof8Δ::kanMX6</i>                        |
|         | TN17172               | <i>est1-myc pof8Δ</i>                                                                                    | <i>h+ leu1-32 ura4-D18 his3-D1 est1<sup>+</sup>::G8-13myc-kanMX6 pof8Δ::kanMX6</i>                        |
|         | TN17380               | <i>est1-myc ter1Δ</i>                                                                                    | <i>h+ leu1-32 ura4-D18 his3-D1 est1<sup>+</sup>::G8-13myc-kanMX6 ter1-Δ[25-1135]::ura4<sup>+</sup>-tk</i> |
|         | TN17381               | <i>est1-myc ter1Δ</i>                                                                                    | <i>h+ leu1-32 ura4-D18 his3-D1 est1<sup>+</sup>::G8-13myc-kanMX6 ter1-Δ[25-1135]::ura4<sup>+</sup>-tk</i> |
| 1e      | TN2411                | <i>pof8<sup>+</sup></i> (no tag)                                                                         | <i>h- leu1-32 ura4-D18 his3-D1</i>                                                                        |
|         | AM16931               | <i>pof8-myc</i>                                                                                          | <i>h+ leu1-32 ura4-D18 his3-D1 pof8<sup>+</sup>::13myc-kanMX6</i>                                         |
|         | AM16932               | <i>pof8-myc</i>                                                                                          | <i>h- leu1-32 ura4-D18 his3-D1 pof8<sup>+</sup>::13myc-kanMX6</i>                                         |
|         | AM17629               | <i>pof8-myc ter1Δ</i>                                                                                    | <i>h+ leu1-32 ura4-D18 his3-D1 ter1-Δ[25-1135]::ura4<sup>+</sup>-tk pof8<sup>+</sup>::13myc-kanMX6</i>    |
|         | AM17630               | <i>pof8-myc ter1Δ</i>                                                                                    | <i>h+ leu1-32 ura4-D18 his3-D1 ter1-Δ[25-1135]::ura4<sup>+</sup>-tk pof8<sup>+</sup>::13myc-kanMX6</i>    |
|         | AM17036               | <i>pof8-myc ccq1Δ</i>                                                                                    | <i>h- leu1-32 ura4-D18 his3-D1 ccq1Δ::hphMX pof8<sup>+</sup>::13myc-kanMX6</i>                            |
|         | AM17037               | <i>pof8-myc ccq1Δ</i>                                                                                    | <i>h+ leu1-32 ura4-D18 his3-D1 ccq1Δ::hphMX pof8<sup>+</sup>::13myc-kanMX6</i>                            |
|         | AM17026               | <i>pof8-myc trt1Δ</i>                                                                                    | <i>h- leu1-32 ura4-D18 his3-D1 trt1Δ::his3<sup>+</sup> pof8<sup>+</sup>::13myc-kanMX6</i>                 |
|         | AM17027               | <i>pof8-myc trt1Δ</i>                                                                                    | <i>h- leu1-32 ura4-D18 ade6-M210 his3-D1 trt1Δ::his3<sup>+</sup> pof8<sup>+</sup>::13myc-kanMX6</i>       |
|         | AM17029               | <i>pof8-myc est1Δ</i>                                                                                    | <i>h+ leu1-32 ura4-D18 ade6-M210 his3-D1 est1Δ::kanMX6 pof8<sup>+</sup>::13myc-kanMX6</i>                 |
| AM17030 | <i>pof8-myc est1Δ</i> | <i>h+ leu1-32 ura4-D18 ade6-M210 his3-D1 est1Δ::kanMX6 pof8<sup>+</sup>::13myc-kanMX6</i>                |                                                                                                           |
| 3a      | TN2411                | <i>pof8<sup>+</sup></i> (no tag)                                                                         | <i>h- leu1-32 ura4-D18 his3-D1</i>                                                                        |
|         | TN12132               | <i>pof8-myc</i>                                                                                          | <i>h- leu1-32 ura4-D18 ade6-M210 his3-D1 pof8<sup>+</sup>::13myc-kanMX6</i>                               |
|         | AM16931               | <i>pof8-myc</i>                                                                                          | <i>h+ leu1-32 ura4-D18 his3-D1 pof8<sup>+</sup>::13myc-kanMX6</i>                                         |
|         | AM16932               | <i>pof8-myc</i>                                                                                          | <i>h- leu1-32 ura4-D18 his3-D1 pof8<sup>+</sup>::13myc-kanMX6</i>                                         |
|         | AM17036               | <i>pof8-myc ccq1Δ</i>                                                                                    | <i>h- leu1-32 ura4-D18 his3-D1 ccq1Δ::hphMX pof8<sup>+</sup>::13myc-kanMX6</i>                            |
|         | AM17037               | <i>pof8-myc ccq1Δ</i>                                                                                    | <i>h+ leu1-32 ura4-D18 his3-D1 ccq1Δ::hphMX pof8<sup>+</sup>::13myc-kanMX6</i>                            |
|         | AM17026               | <i>pof8-myc trt1Δ</i>                                                                                    | <i>h- leu1-32 ura4-D18 his3-D1 trt1Δ::his3<sup>+</sup> pof8<sup>+</sup>::13myc-kanMX6</i>                 |
|         | AM17027               | <i>pof8-myc trt1Δ</i>                                                                                    | <i>h- leu1-32 ura4-D18 ade6-M210 his3-D1 trt1Δ::his3<sup>+</sup> pof8<sup>+</sup>::13myc-kanMX6</i>       |
|         | AM17029               | <i>pof8-myc est1Δ</i>                                                                                    | <i>h+ leu1-32 ura4-D18 ade6-M210 his3-D1 est1Δ::kanMX6 pof8<sup>+</sup>::13myc-kanMX6</i>                 |
|         | AM17030               | <i>pof8-myc est1Δ</i>                                                                                    | <i>h+ leu1-32 ura4-D18 ade6-M210 his3-D1 est1Δ::kanMX6 pof8<sup>+</sup>::13myc-kanMX6</i>                 |
| 3b      | TN2411                | <i>trt1<sup>+</sup></i> (no tag)                                                                         | <i>h- leu1-32 ura4-D18 his3-D1</i>                                                                        |
|         | TN7706                | <i>trt1-myc</i>                                                                                          | <i>h- leu1-32 ura4-D18 his3-D1 trt1<sup>+</sup>::G8-13myc-kanMX6</i>                                      |
|         | TN10695               | <i>trt1-myc</i>                                                                                          | <i>h- leu1-32 ura4-D18 his3-D1 trt1<sup>+</sup>::G8-13myc-natMX6</i>                                      |
|         | TN10696               | <i>trt1-myc</i>                                                                                          | <i>h- leu1-32 ura4-D18 his3-D1 trt1<sup>+</sup>::G8-13myc-natMX6</i>                                      |
|         | TN16187               | <i>trt1-myc pof8Δ</i>                                                                                    | <i>h- leu1-32 ura4-D18 his3-D1 trt1<sup>+</sup>::G8-13myc-natMX6 pof8Δ::kanMX6</i>                        |
|         | TN16188               | <i>trt1-myc pof8Δ</i>                                                                                    | <i>h- leu1-32 ura4-D18 his3-D1 trt1<sup>+</sup>::G8-13myc-natMX6 pof8Δ::kanMX6</i>                        |
|         | TN16189               | <i>trt1-myc pof8Δ</i>                                                                                    | <i>h- leu1-32 ura4-D18 his3-D1 trt1<sup>+</sup>::G8-13myc-natMX6 pof8Δ::kanMX6</i>                        |
|         | TN17597               | <i>trt1-myc pof8-Δ[289-402]</i>                                                                          | <i>h+ leu1-32 ura4-D18 his3-D1 trt1<sup>+</sup>::G8-13myc-kanMX6 pof8-Δ[289-402]::natMX6</i>              |



|      |                                                                                                           |                                                                                                                                                                                                                                                       |                                                                                                                                                                                                                                                                                                                                                                                                                                                                                                                                                                                                                                                                                                                                                                                                                                                   |
|------|-----------------------------------------------------------------------------------------------------------|-------------------------------------------------------------------------------------------------------------------------------------------------------------------------------------------------------------------------------------------------------|---------------------------------------------------------------------------------------------------------------------------------------------------------------------------------------------------------------------------------------------------------------------------------------------------------------------------------------------------------------------------------------------------------------------------------------------------------------------------------------------------------------------------------------------------------------------------------------------------------------------------------------------------------------------------------------------------------------------------------------------------------------------------------------------------------------------------------------------------|
|      | TN17598                                                                                                   | <i>trt1-myc pof8-Δ[289-402]</i>                                                                                                                                                                                                                       | <i>h+ leu1-32 ura4-D18 his3-D1 trt1+::G8-13myc-kanMX6 pof8-Δ[289-402]::natMX6</i>                                                                                                                                                                                                                                                                                                                                                                                                                                                                                                                                                                                                                                                                                                                                                                 |
| 3c   | TN2411<br>TN17157<br>TN17158<br>TN17171<br>TN17172                                                        | <i>est1<sup>+</sup></i> (no tag)<br><i>est1-myc</i><br><i>est1-myc</i><br><i>est1-myc pof8Δ</i><br><i>est1-myc pof8Δ</i>                                                                                                                              | <i>h- leu1-32 ura4-D18 his3-D1</i><br><i>h- leu1-32 ura4-D18 his3-D1 est1<sup>+</sup>::G8-13myc-kanMX6</i><br><i>h- leu1-32 ura4-D18 his3-D1 est1<sup>+</sup>::G8-13myc-kanMX6</i><br><i>h- leu1-32 ura4-D18 his3-D1 est1<sup>+</sup>::G8-13myc-kanMX6 pof8Δ::kanMX6</i><br><i>h+ leu1-32 ura4-D18 his3-D1 est1<sup>+</sup>::G8-13myc-kanMX6 pof8Δ::kanMX6</i>                                                                                                                                                                                                                                                                                                                                                                                                                                                                                    |
| 3d   | AM17926<br>AM17931                                                                                        | <i>pof8-PK</i><br><i>pof8-PK trt1-myc</i>                                                                                                                                                                                                             | <i>h- leu1-32 ura4-D18 his3-D1 pof8<sup>+</sup>::12PK-hphMX6</i><br><i>h+ leu1-32 ura4-D18 his3-D1 trt1<sup>+</sup>::G8-13myc-kanMX6 pof8<sup>+</sup>::12PK-hphMX6</i>                                                                                                                                                                                                                                                                                                                                                                                                                                                                                                                                                                                                                                                                            |
| 4a-b | TN2411<br>TN12118<br>TN12119                                                                              | wt<br><i>pof8Δ</i><br><i>pof8Δ</i>                                                                                                                                                                                                                    | <i>h- leu1-32 ura4-D18 his3-D1</i><br><i>h- leu1-32 ura4-D18 his3-D1 pof8Δ::kanMX6</i><br><i>h+ leu1-32 ura4-D18 his3-D1 pof8Δ::kanMX6</i>                                                                                                                                                                                                                                                                                                                                                                                                                                                                                                                                                                                                                                                                                                        |
| 4c   | TN2411<br>AM17121<br>TN17147<br>AM17644<br>AM17645                                                        | <i>lsm3<sup>+</sup></i> (no tag)<br><i>lsm3-myc</i><br><i>lsm3-myc</i><br><i>lsm3-myc pof8Δ</i><br><i>lsm3-myc pof8Δ</i>                                                                                                                              | <i>h- leu1-32 ura4-D18 his3-D1</i><br><i>h- leu1-32 ura4-D18 his3-D1 lsm3<sup>+</sup>::13myc-kanMX6</i><br><i>h+ leu1-32 ura4-D18 his3-D1 lsm3<sup>+</sup>::13myc-kanMX6</i><br><i>h+ leu1-32 ura4-D18 his3-D1 pof8Δ::kanMX lsm3<sup>+</sup>::13myc-kanMX6</i><br><i>h- leu1-32 ura4-D18 his3-D1 pof8Δ::kanMX6 lsm3<sup>+</sup>::13myc-kanMX6</i>                                                                                                                                                                                                                                                                                                                                                                                                                                                                                                 |
| 4d   | AM17755<br>AM17746<br>AM17946<br>AM17949<br><br>AM17950                                                   | <i>lsm3-PK</i><br><i>lsm3-PK pof8-myc</i><br><i>lsm3-PK pof8-Δ[289-402]-myc</i><br><i>lsm3-PK pof8-myc ter1Δ</i><br><br><i>lsm3-PK pof8-myc ter1Δ</i>                                                                                                 | <i>h+ leu1-32 ura4-D18 his3-D1 lsm3<sup>+</sup>::12PK-natMX6</i><br><i>h+ leu1-32 ura4-D18 his3-D1 pof8<sup>+</sup>::13myc-kanMX6 lsm3<sup>+</sup>::12PK-natMX6</i><br><i>h- leu1-32 ura4-D18 his3-D1 pof8-Δ[289-402]::13myc-kanMX6 lsm3<sup>+</sup>::12PK-natMX6</i><br><i>h+ leu1-32 ura4-D18 his3-D1 ter1Δ[25-1135]::ura4<sup>+</sup>-tk pof8<sup>+</sup>::13myc-kanMX6 lsm3<sup>+</sup>::12PK-natMX6</i><br><i>h+ leu1-32 ura4-D18 his3-D1 ter1Δ[25-1135]::ura4<sup>+</sup>-tk pof8<sup>+</sup>::13myc-kanMX6 lsm3<sup>+</sup>::12PK-natMX6</i>                                                                                                                                                                                                                                                                                               |
| 4e   | AM17755<br>AM17744<br>AM17943                                                                             | <i>lsm3-PK</i><br><i>lsm3-PK trt1-myc</i><br><i>lsm3-PK trt1-myc pof8Δ</i>                                                                                                                                                                            | <i>h+ leu1-32 ura4-D18 his3-D1 lsm3<sup>+</sup>::12PK-natMX6</i><br><i>h+ leu1-32 ura4-D18 his3-D1 trt1<sup>+</sup>::G8-13myc-kanMX6 lsm3<sup>+</sup>::12PK-natMX6</i><br><i>h+ leu1-32 ura4-D18 his3-D1 trt1<sup>+</sup>::G8-13myc-kanMX6 pof8Δ::kanMX6 lsm3<sup>+</sup>::12PK-natMX6</i>                                                                                                                                                                                                                                                                                                                                                                                                                                                                                                                                                        |
| 4f   | TN2411<br>AM17121<br>TN17147<br>AM17644<br>AM17645<br>TN17409<br>TN17410<br>TN17415<br>TN17416<br>AM17641 | <i>lsm3<sup>+</sup></i> (no tag)<br><i>lsm3-myc</i><br><i>lsm3-myc</i><br><i>lsm3-myc pof8Δ</i><br><i>lsm3-myc pof8Δ</i><br><i>lsm3-myc ter1Δ</i><br><i>lsm3-myc ter1Δ</i><br><i>lsm3-myc trt1Δ</i><br><i>lsm3-myc trt1Δ</i><br><i>lsm3-myc est1Δ</i> | <i>h- leu1-32 ura4-D18 his3-D1</i><br><i>h- leu1-32 ura4-D18 his3-D1 lsm3<sup>+</sup>::13myc-kanMX6</i><br><i>h+ leu1-32 ura4-D18 his3-D1 lsm3<sup>+</sup>::13myc-kanMX6</i><br><i>h+ leu1-32 ura4-D18 his3-D1 pof8Δ::kanMX6 lsm3<sup>+</sup>::13myc-kanMX6</i><br><i>h- leu1-32 ura4-D18 his3-D1 pof8Δ::kanMX6 lsm3<sup>+</sup>::13myc-kanMX6</i><br><i>h+ leu1-32 ura4-D18 his3-D1 ter1Δ[25-1135]::ura4<sup>+</sup>-tk lsm3<sup>+</sup>::13myc-kanMX6</i><br><i>h+ leu1-32 ura4-D18 his3-D1 ter1Δ[25-1135]::ura4<sup>+</sup>-tk lsm3<sup>+</sup>::13myc-kanMX6</i><br><i>h- leu1-32 ura4-D18 his3-D1 trt1Δ::his3<sup>+</sup> lsm3<sup>+</sup>::13myc-kanMX6</i><br><i>h- leu1-32 ura4-D18 his3-D1 trt1Δ::his3<sup>+</sup> lsm3<sup>+</sup>::13myc-kanMX6</i><br><i>h+ leu1-32 ura4-D18 his3-D1 est1Δ::hphMX6 lsm3<sup>+</sup>::13myc-kanMX6</i> |
| 5a   | TN17837<br>TN17836<br>TN17854<br>TN17856<br>TN17858<br>TN17859                                            | wt / No pld +B1<br>wt / No pld -B1<br><i>pof8Δ</i> / Empty pld +B1<br><i>pof8Δ</i> / Empty pld -B1<br><i>pof8Δ</i> / TER1 OE pld +B1<br><i>pof8Δ</i> / TER1 OE pld -B1                                                                                | <i>h- leu1-32 his3-D1</i><br><i>h- leu1-32 his3-D1</i><br><i>h- leu1-32 ura4-D18 his3-D1 pof8Δ::kanMX //pREP42</i><br><i>h- leu1-32 ura4-D18 his3-D1 pof8Δ::kanMX //pREP42</i><br><i>h- leu1-32 ura4-D18 his3-D1 pof8Δ::kanMX //pREP42-TER1</i><br><i>h- leu1-32 ura4-D18 his3-D1 pof8Δ::kanMX //pREP42-TER1</i>                                                                                                                                                                                                                                                                                                                                                                                                                                                                                                                                  |
| 5b   | TN17836<br>AM17109<br>TN17848<br>TN17856<br>TN17860                                                       | wt / No pld -B1<br><i>ter1Δ</i> / No pld -B1<br><i>ter1Δ</i> / TER1 OE pld -B1<br><i>pof8Δ</i> / Empty pld -B1<br><i>pof8Δ</i> / TER1 OE pld -B1                                                                                                      | <i>h- leu1-32 his3-D1</i><br><i>h- leu1-32 ura4-D18 his3-D1 ter1Δ25-1135:ura4+::tk</i><br><i>h- leu1-32 ura4-D18 his3-D1 ter1Δ25-1135:ura4+::tk //pREP41-TER1</i><br><i>h- leu1-32 ura4-D18 his3-D1 pof8Δ::kanMX //pREP42</i><br><i>h- leu1-32 ura4-D18 his3-D1 pof8Δ::kanMX //pREP42</i>                                                                                                                                                                                                                                                                                                                                                                                                                                                                                                                                                         |
| 5c   | TN17836<br>TN17892<br>TN17916<br>TN17908                                                                  | wt (no tag) / No pld -B1<br><i>trt1-myc</i> / Empty pld -B1<br><i>trt1-myc pof8Δ</i> / Empty pld -B1<br><i>trt1-myc pof8Δ</i> / TER1 OE pld -B1                                                                                                       | <i>h- leu1-32 his3-D1</i><br><i>h- leu1-32 ura4-D18 his3-D1 trt1<sup>+</sup>::G8-13myc-natMX6 //pREP2</i><br><i>h- leu1-32 ura4-D18 his3-D1 trt1<sup>+</sup>::G8-13myc-natMX6 pof8Δ::kanMX6 //pREP2</i><br><i>h- leu1-32 ura4-D18 his3-D1 trt1<sup>+</sup>::G8-13myc-natMX6 pof8Δ::kanMX6 //pREP42-TER1</i>                                                                                                                                                                                                                                                                                                                                                                                                                                                                                                                                       |
| 5d   | TN17837<br>TN17890<br>TN17891<br>TN17892<br>TN17893                                                       | wt (no tag) / No pld +B1<br><i>trt1-myc</i> / Empty pld +B1<br><i>trt1-myc</i> / Empty pld +B1<br><i>trt1-myc</i> / Empty pld -B1<br><i>trt1-myc</i> / Empty pld -B1                                                                                  | <i>h- leu1-32 his3-D1</i><br><i>h- leu1-32 ura4-D18 his3-D1 trt1<sup>+</sup>::G8-13myc-natMX6 pof8Δ::kanMX6 //pREP2</i><br><i>h- leu1-32 ura4-D18 his3-D1 trt1<sup>+</sup>::G8-13myc-natMX6 pof8Δ::kanMX6 //pREP2</i><br><i>h- leu1-32 ura4-D18 his3-D1 trt1<sup>+</sup>::G8-13myc-natMX6 pof8Δ::kanMX6 //pREP2</i><br><i>h- leu1-32 ura4-D18 his3-D1 trt1<sup>+</sup>::G8-13myc-natMX6 pof8Δ::kanMX6 //pREP2</i>                                                                                                                                                                                                                                                                                                                                                                                                                                 |

|         |                                          |                                                                                                  |                                                                                                                   |
|---------|------------------------------------------|--------------------------------------------------------------------------------------------------|-------------------------------------------------------------------------------------------------------------------|
| TN17914 | <i>trt1-myc pof8Δ</i> / Empty plid +B1   | <i>h- leu1-32 ura4-D18 his3-D1 trt1<sup>+</sup>::G8-13myc-natMX6 pof8Δ::kanMX6 //pREP2</i>       |                                                                                                                   |
| TN17915 | <i>trt1-myc pof8Δ</i> / Empty plid +B1   | <i>h- leu1-32 ura4-D18 his3-D1 trt1<sup>+</sup>::G8-13myc-natMX6 pof8Δ::kanMX6 //pREP2</i>       |                                                                                                                   |
| TN17906 | <i>trt1-myc pof8Δ</i> / TER1 OE plid +B1 | <i>h- leu1-32 ura4-D18 his3-D1 trt1<sup>+</sup>::G8-13myc-natMX6 pof8Δ::kanMX6 //pREP42-TER1</i> |                                                                                                                   |
| TN17910 | <i>trt1-myc pof8Δ</i> / TER1 OE plid +B1 | <i>h- leu1-32 ura4-D18 his3-D1 trt1<sup>+</sup>::G8-13myc-natMX6 pof8Δ::kanMX6 //pREP42-TER1</i> |                                                                                                                   |
| TN17908 | <i>trt1-myc pof8Δ</i> / TER1 OE plid -B1 | <i>h- leu1-32 ura4-D18 his3-D1 trt1<sup>+</sup>::G8-13myc-natMX6 pof8Δ::kanMX6 //pREP42-TER1</i> |                                                                                                                   |
| TN17912 | <i>trt1-myc pof8Δ</i> / TER1 OE plid -B1 | <i>h- leu1-32 ura4-D18 his3-D1 trt1<sup>+</sup>::G8-13myc-natMX6 pof8Δ::kanMX6 //pREP42-TER1</i> |                                                                                                                   |
| 6a      | TN17580                                  | <i>pof8<sup>+</sup></i>                                                                          | <i>h- leu1-32 ura4-D18 his3-D1 pof8<sup>+</sup>::natMX6</i>                                                       |
|         | TN12119                                  | <i>pof8Δ</i>                                                                                     | <i>h+ leu1-32 ura4-D18 his3-D1 pof8Δ::kanMX6</i>                                                                  |
|         | TN17582                                  | <i>pof8-Y330A</i>                                                                                | <i>h- leu1-32 ura4-D18 his3-D1 pof8-Y330A::natMX6</i>                                                             |
|         | TN17584                                  | <i>pof8-R343A</i>                                                                                | <i>h- leu1-32 ura4-D18 his3-D1 pof8-R343A::natMX6</i>                                                             |
|         | TN17587                                  | <i>pof8-Δ[390-402]</i>                                                                           | <i>h- leu1-32 ura4-D18 his3-D1 pof8-Δ[390-402]::natMX6</i>                                                        |
|         | TN17586                                  | <i>pof8-Δ[289-402]</i>                                                                           | <i>h- leu1-32 ura4-D18 his3-D1 pof8-Δ[289-402]::natMX6</i>                                                        |
| 6b      | TN2411                                   | <i>pof8+</i> (no tag)                                                                            | <i>h- leu1-32 ura4-D18 his3-D1</i>                                                                                |
|         | TN12132                                  | <i>pof8-myc</i>                                                                                  | <i>h- leu1-32 ura4-D18 ade6-M210 his3-D1 pof8<sup>+</sup>::13myc-kanMX6</i>                                       |
|         | AM16931                                  | <i>pof8-myc</i>                                                                                  | <i>h+ leu1-32 ura4-D18 his3-D1 pof8<sup>+</sup>::13myc-kanMX6</i>                                                 |
|         | AM16932                                  | <i>pof8-myc</i>                                                                                  | <i>h- leu1-32 ura4-D18 his3-D1 pof8<sup>+</sup>::13myc-kanMX6</i>                                                 |
|         | AM17098                                  | <i>pof8-Y330A-myc</i>                                                                            | <i>h- leu1-32 ura4-D18 his3-D1 pof8-Y330A::13myc-kanMX6</i>                                                       |
|         | AM17616                                  | <i>pof8-R343A-myc</i>                                                                            | <i>h- leu1-32 ura4-D18 his3-D1 pof8-R343A::13myc-kanMX6</i>                                                       |
|         | AM17123                                  | <i>pof8-Δ[390-402]-myc</i>                                                                       | <i>h- leu1-32 ura4-D18 his3-D1 pof8-Δ[390-402]::13myc-kanMX6</i>                                                  |
|         | AM17618                                  | <i>pof8-Δ[289-402]-myc</i>                                                                       | <i>h- leu1-32 ura4-D18 his3-D1 pof8-Δ[289-402]::13myc-kanMX6</i>                                                  |
| 6c      | AM16931                                  | <i>pof8-myc</i>                                                                                  | <i>h+ leu1-32 ura4-D18 his3-D1 pof8<sup>+</sup>::13myc-kanMX6</i>                                                 |
|         | AM17098                                  | <i>pof8-Y330A-myc</i>                                                                            | <i>h- leu1-32 ura4-D18 his3-D1 pof8-Y330A::13myc-kanMX6</i>                                                       |
|         | AM17616                                  | <i>pof8-R343A-myc</i>                                                                            | <i>h- leu1-32 ura4-D18 his3-D1 pof8-R343A::13myc-kanMX6</i>                                                       |
|         | AM17123                                  | <i>pof8-Δ[390-402]-myc</i>                                                                       | <i>h- leu1-32 ura4-D18 his3-D1 pof8-Δ[390-402]::13myc-kanMX6</i>                                                  |
|         | AM17618                                  | <i>pof8-Δ[289-402]-myc</i>                                                                       | <i>h- leu1-32 ura4-D18 his3-D1 pof8-Δ[289-402]::13myc-kanMX6</i>                                                  |
|         | TN12118                                  | <i>pof8Δ</i>                                                                                     | <i>h- leu1-32 ura4-D18 his3-D1 pof8Δ::kanMX6</i>                                                                  |
|         | TN12119                                  | <i>pof8Δ</i>                                                                                     | <i>h+ leu1-32 ura4-D18 his3-D1 pof8Δ::kanMX6</i>                                                                  |
| 6d      | TN2411                                   | <i>pof8<sup>+</sup></i> (no tag)                                                                 | <i>h- leu1-32 ura4-D18 his3-D1</i>                                                                                |
|         | AM16931                                  | <i>pof8-myc</i>                                                                                  | <i>h+ leu1-32 ura4-D18 his3-D1 pof8<sup>+</sup>::13myc-kanMX6</i>                                                 |
|         | AM16932                                  | <i>pof8-myc</i>                                                                                  | <i>h- leu1-32 ura4-D18 his3-D1 pof8<sup>+</sup>::13myc-kanMX6</i>                                                 |
|         | AM17098                                  | <i>pof8-Y330A-myc</i>                                                                            | <i>h- leu1-32 ura4-D18 his3-D1 pof8-Y330A::13myc-kanMX6</i>                                                       |
|         | AM17616                                  | <i>pof8-R343A-myc</i>                                                                            | <i>h- leu1-32 ura4-D18 his3-D1 pof8-R343A::13myc-kanMX6</i>                                                       |
|         | AM17123                                  | <i>pof8-Δ[390-402]-myc</i>                                                                       | <i>h- leu1-32 ura4-D18 his3-D1 pof8-Δ[390-402]::13myc-kanMX6</i>                                                  |
|         | AM17618                                  | <i>pof8-Δ[289-402]-myc</i>                                                                       | <i>h- leu1-32 ura4-D18 his3-D1 pof8-Δ[289-402]::13myc-kanMX6</i>                                                  |
|         | AM17629                                  | <i>pof8-myc ter1Δ</i>                                                                            | <i>h+ leu1-32 ura4-D18 his3-D1 ter1Δ[25-1135]::ura4<sup>+</sup>-tk pof8<sup>+</sup>::13myc-kanMX6</i>             |
|         | AM17630                                  | <i>pof8-myc ter1Δ</i>                                                                            | <i>h+ leu1-32 ura4-D18 his3-D1 ter1Δ[25-1135]::ura4<sup>+</sup>-tk pof8<sup>+</sup>::13myc-kanMX6</i>             |
| 6e      | TN2411                                   | <i>trt1<sup>+</sup></i> (no tag)                                                                 | <i>h- leu1-32 ura4-D18 his3-D1</i>                                                                                |
|         | TN10695                                  | <i>trt1-myc</i>                                                                                  | <i>h- leu1-32 ura4-D18 his3-D1 trt1<sup>+</sup>::G8-13myc-natMX6</i>                                              |
|         | TN10696                                  | <i>trt1-myc</i>                                                                                  | <i>h- leu1-32 ura4-D18 his3-D1 trt1<sup>+</sup>::G8-13myc-natMX6</i>                                              |
|         | TN16187                                  | <i>trt1-myc pof8Δ</i>                                                                            | <i>h- leu1-32 ura4-D18 his3-D1 trt1<sup>+</sup>::G8-13myc-natMX6 pof8Δ::kanMX6</i>                                |
|         | TN16188                                  | <i>trt1-myc pof8Δ</i>                                                                            | <i>h- leu1-32 ura4-D18 his3-D1 trt1<sup>+</sup>::G8-13myc-natMX6 pof8Δ::kanMX6</i>                                |
|         | TN16189                                  | <i>trt1-myc pof8Δ</i>                                                                            | <i>h- leu1-32 ura4-D18 his3-D1 trt1<sup>+</sup>::G8-13myc-natMX6 pof8Δ::kanMX6</i>                                |
|         | TN17589                                  | <i>trt1-myc pof8-Y330A</i>                                                                       | <i>h+ leu1-32 ura4-D18 his3-D1 trt1<sup>+</sup>::G8-13myc-kanMX6 pof8-Y330A::natMX6</i>                           |
|         | TN17590                                  | <i>trt1-myc pof8-Y330A</i>                                                                       | <i>h+ leu1-32 ura4-D18 his3-D1 trt1<sup>+</sup>::G8-13myc-kanMX6 pof8-Y330A::natMX6</i>                           |
|         | TN17593                                  | <i>trt1-myc pof8-R343A</i>                                                                       | <i>h+ leu1-32 ura4-D18 his3-D1 trt1<sup>+</sup>::G8-13myc-kanMX6 pof8-R343A::natMX6</i>                           |
|         | TN17594                                  | <i>trt1-myc pof8-R343A</i>                                                                       | <i>h+ leu1-32 ura4-D18 his3-D1 trt1<sup>+</sup>::G8-13myc-kanMX6 pof8-R343A::natMX6</i>                           |
|         | TN17601                                  | <i>trt1-myc pof8-Δ[390-402]</i>                                                                  | <i>h+ leu1-32 ura4-D18 his3-D1 trt1<sup>+</sup>::G8-13myc-kanMX6 pof8-Δ[390-402]::natMX6</i>                      |
|         | TN17602                                  | <i>trt1-myc pof8-Δ[390-402]</i>                                                                  | <i>h+ leu1-32 ura4-D18 his3-D1 trt1<sup>+</sup>::G8-13myc-kanMX6 pof8-Δ[390-402]::natMX6</i>                      |
|         | TN17597                                  | <i>trt1-myc pof8-Δ[289-402]</i>                                                                  | <i>h+ leu1-32 ura4-D18 his3-D1 trt1<sup>+</sup>::G8-13myc-kanMX6 pof8-Δ[289-402]::natMX6</i>                      |
|         | TN17598                                  | <i>trt1-myc pof8-Δ[289-402]</i>                                                                  | <i>h+ leu1-32 ura4-D18 his3-D1 trt1<sup>+</sup>::G8-13myc-kanMX6 pof8-Δ[289-402]::natMX6</i>                      |
| 7a      | TN2411                                   | <i>ccq1<sup>+</sup></i> (no tag)                                                                 | <i>h- leu1-32 ura4-D18 his3-D1</i>                                                                                |
|         | OR12046                                  | <i>ccq1-myc</i>                                                                                  | <i>h+ leu1-32 ura4-D18 his3-D1 ccq1<sup>+</sup>::13myc-hphMX6</i>                                                 |
|         | OR12047                                  | <i>ccq1-myc</i>                                                                                  | <i>h+ leu1-32 ura4-D18 his3-D1 ccq1<sup>+</sup>::13myc-hphMX6</i>                                                 |
|         | AM16956                                  | <i>ccq1-myc pof8Δ</i>                                                                            | <i>h- leu1-32 ura4-D18 his3-D1 ccq1<sup>+</sup>::13myc-hphMX6 pof8Δ::kanMX6</i>                                   |
|         | AM16957                                  | <i>ccq1-myc pof8Δ</i>                                                                            | <i>h+ leu1-32 ura4-D18 his3-D1 ccq1<sup>+</sup>::13myc-hphMX6 pof8Δ::kanMX6</i>                                   |
|         | AM17683                                  | <i>ccq1-myc ter1Δ</i>                                                                            | <i>h+ leu1-32 ura4-D18 his3-D1 ccq1<sup>+</sup>::13myc-kanMX6 ter1Δ[25-1135]::ura4<sup>+</sup>-tk<sup>+</sup></i> |
|         | AM17685                                  | <i>ccq1-myc ter1Δ</i>                                                                            | <i>h+ leu1-32 ura4-D18 his3-D1 ccq1<sup>+</sup>::13myc-kanMX6 ter1Δ[25-1135]::ura4<sup>+</sup>-tk<sup>+</sup></i> |
|         | TN17767                                  | <i>ccq1-myc pof8-Y330A</i>                                                                       | <i>h- leu1-32 ura4-D18 his3-D1 ccq1<sup>+</sup>::13myc-hphMX6 pof8-Y330A::natMX6</i>                              |
|         | TN17768                                  | <i>ccq1-myc pof8-Y330A</i>                                                                       | <i>h- leu1-32 ura4-D18 his3-D1 ccq1<sup>+</sup>::13myc-hphMX6 pof8-Y330A::natMX6</i>                              |
|         | TN17771                                  | <i>ccq1-myc pof8-R343A</i>                                                                       | <i>h- leu1-32 ura4-D18 his3-D1 ccq1<sup>+</sup>::13myc-hphMX6 pof8-R343A::natMX6</i>                              |

|    |         |                                                                |                                                                                                                                                                                               |
|----|---------|----------------------------------------------------------------|-----------------------------------------------------------------------------------------------------------------------------------------------------------------------------------------------|
|    | TN17772 | <i>ccq1-myc pof8-R343A</i>                                     | <i>h- leu1-32 ura4-D18 his3-D1 ccq1<sup>+</sup>::13myc-hphMX6 pof8-R343A::natMX6</i>                                                                                                          |
|    | TN17775 | <i>ccq1-myc pof8-<math>\Delta</math>390-402]</i>               | <i>h- leu1-32 ura4-D18 his3-D1 ccq1<sup>+</sup>::13myc-hphMX6 pof8-<math>\Delta</math>390-402)::natMX6</i>                                                                                    |
|    | TN17776 | <i>ccq1-myc pof8-<math>\Delta</math>390-402]</i>               | <i>h- leu1-32 ura4-D18 his3-D1 ccq1<sup>+</sup>::13myc-hphMX6 pof8-<math>\Delta</math>390-402)::natMX6</i>                                                                                    |
|    | TN17779 | <i>ccq1-myc pof8-<math>\Delta</math>289-402]</i>               | <i>h- leu1-32 ura4-D18 his3-D1 ccq1<sup>+</sup>::13myc-hphMX6 pof8-<math>\Delta</math>289-402)::natMX6</i>                                                                                    |
|    | TN17780 | <i>ccq1-myc pof8-<math>\Delta</math>289-402]</i>               | <i>h- leu1-32 ura4-D18 his3-D1 ccq1<sup>+</sup>::13myc-hphMX6 pof8-<math>\Delta</math>289-402)::natMX6</i>                                                                                    |
| 7b | TN2411  | <i>ura4<sup>-</sup></i>                                        | <i>h- leu1-32 ura4-D18 his3-D1</i>                                                                                                                                                            |
|    | LK7299  | <i>ura4<sup>+</sup></i>                                        | <i>h- leu1-32 his3-D1</i>                                                                                                                                                                     |
|    | CF53    | <i>telo::ura4<sup>+</sup></i>                                  | <i>h<sup>90</sup> leu1-32 ura4-D18 ade6-M210 his3-D1 otr1R(sphI):ade6<sup>+</sup> (cen1) his3<sup>+</sup>:tel(1L) ura4<sup>+</sup>:tel(2L)</i>                                                |
|    | CF17571 | <i>pof8<math>\Delta</math> telo::ura4<sup>+</sup></i>          | <i>h<sup>90</sup> leu1-32 ura4-D18 ade6-M210 his3-D1 pof8<math>\Delta</math>::kanMX6 otr1R(sphI):ade6<sup>+</sup> (cen1) his3<sup>+</sup>:tel(1L) ura4<sup>+</sup>:tel(2L)</i>                |
|    | TN17822 | <i>pof8-<math>\Delta</math>289-402] telo::ura4<sup>+</sup></i> | <i>h<sup>90</sup> leu1-32 ura4-D18 ade6-M210 his3-D1 pof8-<math>\Delta</math>289-402)::13myc-kanMX6 otr1R(sphI):ade6<sup>+</sup> (cen1) his3<sup>+</sup>:tel(1L) ura4<sup>+</sup>:tel(2L)</i> |
|    | TN17823 | <i>pof8-R343A telo::ura4<sup>+</sup></i>                       | <i>h<sup>90</sup> leu1-32 ura4-D18 ade6-M210 his3-D1 pof8-R343A::13myc-kanMX6 otr1R(sphI):ade6<sup>+</sup> (cen1) his3<sup>+</sup>:tel(1L) ura4<sup>+</sup>:tel(2L)</i>                       |
|    | TN17816 | <i>ccq1<math>\Delta</math> telo::ura4<sup>+</sup></i>          | <i>h- leu1-32 ura4-D18 his3-D1 ccq1<math>\Delta</math>::hphMX his3<sup>+</sup>:tel(1L) ura4<sup>+</sup>:tel(2L)</i>                                                                           |
| 7d | TN2409  | wt                                                             | <i>h+ leu1-32 ura4-D18 his3-D1</i>                                                                                                                                                            |
|    | TN2411  | wt                                                             | <i>h- leu1-32 ura4-D18 his3-D1</i>                                                                                                                                                            |
|    | AM17109 | <i>ter1<math>\Delta</math></i>                                 | <i>h- leu1-32 ura4-D18 his3-D1 ter1<math>\Delta</math>[25-1135]:ura4<sup>+</sup>-tk</i>                                                                                                       |
|    | AM17307 | <i>ter1<math>\Delta</math></i>                                 | <i>h+ leu1-32 ura4-D18 his3-D1 ter1<math>\Delta</math>[25-1135]:ura4<sup>+</sup>-tk</i>                                                                                                       |
|    | TN5345  | <i>rap1<math>\Delta</math></i>                                 | <i>h+ leu1-32 ura4-D18 his3-D1 rap1<math>\Delta</math>::ura4<sup>+</sup></i>                                                                                                                  |
|    | TN5346  | <i>rap1<math>\Delta</math></i>                                 | <i>h+ leu1-32 ura4-D18 his3-D1 rap1<math>\Delta</math>::ura4<sup>+</sup></i>                                                                                                                  |
|    | LK8667  | <i>ccq1<math>\Delta</math></i>                                 | <i>h- leu1-32 ura4-D18 his3-D1 ccq1<math>\Delta</math>::hphMX</i>                                                                                                                             |
|    | LK8668  | <i>ccq1<math>\Delta</math></i>                                 | <i>h- leu1-32 ura4-D18 his3-D1 ccq1<math>\Delta</math>::hphMX</i>                                                                                                                             |
|    | TN12118 | <i>pof8<math>\Delta</math></i>                                 | <i>h- leu1-32 ura4-D18 his3-D1 pof8<math>\Delta</math>::kanMX6</i>                                                                                                                            |
|    | TN12119 | <i>pof8<math>\Delta</math></i>                                 | <i>h+ leu1-32 ura4-D18 his3-D1 pof8<math>\Delta</math>::kanMX6</i>                                                                                                                            |
|    | AM16931 | <i>pof8-myc</i>                                                | <i>h+ leu1-32 ura4-D18 his3-D1 pof8<sup>+</sup>::13myc-kanMX6</i>                                                                                                                             |
|    | AM17098 | <i>pof8-Y330A-myc</i>                                          | <i>h- leu1-32 ura4-D18 his3-D1 pof8-Y330A::13myc-kanMX6</i>                                                                                                                                   |
|    | AM17616 | <i>pof8-R343A-myc</i>                                          | <i>h- leu1-32 ura4-D18 his3-D1 pof8-R343A::13myc-kanMX6</i>                                                                                                                                   |
|    | AM17123 | <i>pof8-<math>\Delta</math>[390-402]-myc</i>                   | <i>h- leu1-32 ura4-D18 his3-D1 pof8-<math>\Delta</math>[390-402]:13myc-kanMX6</i>                                                                                                             |
|    | AM17618 | <i>pof8-<math>\Delta</math>[289-402]-myc</i>                   | <i>h- leu1-32 ura4-D18 his3-D1 pof8-<math>\Delta</math>[289-402]:13myc-kanMX6</i>                                                                                                             |
| S1 | TN2411  | <i>trt1<sup>+</sup> (no tag)</i>                               | <i>h- leu1-32 ura4-D18 his3-D1</i>                                                                                                                                                            |
|    | TN10695 | <i>trt1-myc</i>                                                | <i>h- leu1-32 ura4-D18 his3-D1 trt1<sup>+</sup>::G8-13myc-natMX6</i>                                                                                                                          |
|    | AM16931 | <i>pof8-myc</i>                                                | <i>h+ leu1-32 ura4-D18 his3-D1 pof8<sup>+</sup>::13myc-kanMX6</i>                                                                                                                             |
|    | AM17630 | <i>pof8-myc ter1<math>\Delta</math></i>                        | <i>h+ leu1-32 ura4-D18 his3-D1 ter1<math>\Delta</math>[25-1135]:ura4<sup>+</sup>-tk pof8<sup>+</sup>::13myc-kanMX6</i>                                                                        |
|    | AM17121 | <i>lsm3-myc</i>                                                | <i>h- leu1-32 ura4-D18 his3-D1 lsm3<sup>+</sup>::13myc-kanMX6</i>                                                                                                                             |
|    | TN17409 | <i>lsm3-myc ter1<math>\Delta</math></i>                        | <i>h+ leu1-32 ura4-D18 his3-D1 ter1<math>\Delta</math>[25-1135]:ura4<sup>+</sup>-tk lsm3<sup>+</sup>::13myc-kanMX6</i>                                                                        |
| S4 | TN2411  | <i>trt1<sup>+</sup> (no tag)</i>                               | <i>h- leu1-32 ura4-D18 his3-D1</i>                                                                                                                                                            |
|    | LK8667  | <i>ccq1<math>\Delta</math></i>                                 | <i>h- leu1-32 ura4-D18 his3-D1 ccq1<math>\Delta</math>::hphMX</i>                                                                                                                             |
|    | LK8668  | <i>ccq1<math>\Delta</math></i>                                 | <i>h- leu1-32 ura4-D18 his3-D1 ccq1<math>\Delta</math>::hphMX</i>                                                                                                                             |
|    | TN10817 | <i>trt1<math>\Delta</math></i>                                 | <i>h- leu1-32 ura4-D18 ade6-M210 his3-D1 trt1<math>\Delta</math>::his3<sup>+</sup></i>                                                                                                        |
|    | TN10818 | <i>trt1<math>\Delta</math></i>                                 | <i>h- leu1-32 ura4-D18 ade6-M210 his3-D1 trt1<math>\Delta</math>::his3<sup>+</sup></i>                                                                                                        |
|    | TN10728 | <i>est1<math>\Delta</math></i>                                 | <i>h+ leu1-32 ura4-D18 ade6-M210 his3-D1 est1<math>\Delta</math>::hphMX</i>                                                                                                                   |
|    | TN10729 | <i>est1<math>\Delta</math></i>                                 | <i>h+ leu1-32 ura4-D18 ade6-M210 his3-D1 est1<math>\Delta</math>::hphMX</i>                                                                                                                   |
| S5 | TN2409  | wt                                                             | <i>h+ leu1-32 ura4-D18 his3-D1</i>                                                                                                                                                            |
|    | TN2411  | wt                                                             | <i>h- leu1-32 ura4-D18 his3-D1</i>                                                                                                                                                            |
|    | AM17109 | <i>ter1<math>\Delta</math></i>                                 | <i>h- leu1-32 ura4-D18 his3-D1 ter1<math>\Delta</math>[25-1135]:ura4<sup>+</sup>-tk</i>                                                                                                       |
|    | AM17307 | <i>ter1<math>\Delta</math></i>                                 | <i>h+ leu1-32 ura4-D18 his3-D1 ter1<math>\Delta</math>[25-1135]:ura4<sup>+</sup>-tk</i>                                                                                                       |
|    | TN12118 | <i>pof8<math>\Delta</math></i>                                 | <i>h- leu1-32 ura4-D18 his3-D1 pof8<math>\Delta</math>::kanMX6</i>                                                                                                                            |
|    | TN12119 | <i>pof8<math>\Delta</math></i>                                 | <i>h+ leu1-32 ura4-D18 his3-D1 pof8<math>\Delta</math>::kanMX6</i>                                                                                                                            |

\*Rad52 was previously known as Rad22 in *S. pombe*, but it has been officially renamed to be more consistent with the name used in other organisms for orthologs of this protein.

**Supplementary Table 2: Sources of various mutated and tagged alleles for fission yeast strains used in this study.****Previously published strains**

| Mutated & epitope-tagged alleles                                                              | Source |
|-----------------------------------------------------------------------------------------------|--------|
| <i>taz1Δ::ura4<sup>+</sup></i>                                                                | [9]    |
| <i>rap1Δ::ura4<sup>+</sup></i>                                                                | [10]   |
| <i>poz1Δ::natMX6</i>                                                                          | [11]   |
| <i>rif1Δ::ura4<sup>+</sup></i>                                                                | [10]   |
| <i>trt1<sup>+</sup>::G8-13myc-kanMX6</i>                                                      | [12]   |
| <i>est1<sup>+</sup>::G8-13myc-kanMX6</i>                                                      | [12]   |
| <i>ccq1Δ::hphMX6</i>                                                                          | [13]   |
| <i>trt1Δ::his3<sup>+</sup></i>                                                                | [14]   |
| <i>est1Δ::kanMX6</i>                                                                          | [15]   |
| <i>otr1R(sphI)::ade6<sup>+</sup> (cen1) his3<sup>+</sup>:tel(1L) ura4<sup>+</sup>:tel(2L)</i> | [16]   |

**New strains generated for this study**

| Mutated & epitope-tagged alleles           | Comment                                                                                                                                              |
|--------------------------------------------|------------------------------------------------------------------------------------------------------------------------------------------------------|
| <i>trt1<sup>+</sup>::G8-13myc-natMX6</i>   | Marker swap of <i>trt1<sup>+</sup>::G8-13myc:kanMX6</i> [12] by PCR-based method.                                                                    |
| <i>ccq1<sup>+</sup>::13myc-hphMX6</i>      | Marker swap of <i>ccq1<sup>+</sup>::13myc-kanMX6</i> [13] by PCR-based method.                                                                       |
| <i>ter1Δ[25-1135]::ura4<sup>+</sup>-tk</i> | Generated by two-step PCR-based method with plasmid 81 (Supplementary Table 3) and primers 1637, 1638, 1639, 1640 (Supplementary Table 4).           |
| <i>lsm3<sup>+</sup>::12PK-kanMX6</i>       | Generated by two-step PCR-based method [17] with plasmid 973 (Supplementary Table 3) and primers 1686, 1689, 1687, 1690 (Supplementary Table 4).     |
| <i>lsm3<sup>+</sup>::13myc-kanMX6</i>      | Generated by two-step PCR-based method [17] with plasmid 7 (Supplementary Table 3) and primers 1686, 1689, 1687, 1690 (Supplementary Table 4).       |
| <i>pof8Δ::kanMX6</i>                       | Generated by two-step PCR-based method [17] with plasmid 7 (Supplementary Table 3) and primers 1383, 1390, 1386, and 1391 (Supplementary Table 4).   |
| <i>pof8<sup>+</sup>::12PK-kanMX6</i>       | Generated by two-step PCR-based method [17] with plasmid 973 (Supplementary Table 3) and primers 1385, 1382, 1386, and 1391 (Supplementary Table 4). |
| <i>pof8<sup>+</sup>::13myc-kanMX6</i>      | Generated by two-step PCR-based method [17] with plasmid 7 (Supplementary Table 3) and primers 1385, 1382, 1386, and 1391 (Supplementary Table 4).   |
| <i>pof8-Y330A::13myc-kanMX6</i>            | Generated by two-step PCR-based method [18] with <i>pof8-myc</i> strain and primers 1699, 1655, 1656, 1386 (Supplementary Table 4).                  |
| <i>pof8-R343A::13myc-kanMX6</i>            | Generated by two-step PCR-based method [18] with <i>pof8-myc</i> strain and primers 1699, 1658, 1386 (Supplementary Table 4).                        |
| <i>pof8-[Δ390-402]::13myc-kanMX6</i>       | Generated by two-step PCR-based method [18] with <i>pof8-myc</i> strain and primers 1699, 1648, 1386 (Supplementary Table 4).                        |
| <i>pof8-[Δ289-402]::13myc-kanMX6</i>       | Generated by two-step PCR-based method [18] with <i>pof8-myc</i> strain and primers 1699, 1647, 1386 (Supplementary Table 4).                        |
| <i>pof8<sup>+</sup>::natMX6 (wt)</i>       | Removed epitope tag of <i>pof8-myc</i> strain via PCR-based method and primers 1699, 1724, 1285, 1386 (Supplementary Table 4).                       |
| <i>pof8-Y330A::natMX6</i>                  | Removed epitope tag of <i>pof8-Y330A-myc</i> strain via PCR-based method and primers 1699, 1724, 1285, 1386 (Supplementary Table 4).                 |
| <i>pof8-R343A::natMX6</i>                  | Removed epitope tag of <i>pof8-R343A-myc</i> strain via PCR-based method and primers 1699, 1724, 1285, 1386 (Supplementary Table 4).                 |
| <i>pof8-[Δ390-402]::natMX6</i>             | Removed epitope tag of <i>pof8-[Δ390-402]-myc</i> strain via PCR-based method and primers 1699, 1726, 1285, 1386 (Supplementary Table 4).            |
| <i>pof8-[Δ289-402]::natMX6</i>             | Removed epitope tag of <i>pof8-[Δ289-402]-myc</i> strain via PCR-based method and primers 1699, 1725, 1285, 1386 (Supplementary Table 4).            |

**Supplementary Table 3: Plasmids used in this study.****Plasmids used in fission yeast strain construction.**

| Stock # & plasmid name     | Genes                                           | Description                                                                                                                                                         |
|----------------------------|-------------------------------------------------|---------------------------------------------------------------------------------------------------------------------------------------------------------------------|
| 7 pFA6a-13myc-kanMX6 [17]  | <i>kanMX6; ampR</i>                             | Used as a PCR template to generate 13xmyc-tagged strains and pof8Δ::kanMX6 strain.                                                                                  |
| 973 pFA6a-12PK-kanMX6 [19] | <i>kanMX6; ampR</i>                             | Used as a PCR template to generate 12xPK-tagged strains.                                                                                                            |
| 81 pNR228 [20]             | <i>ura4<sup>+</sup>; adh1::tk</i>               | Used as a PCR template to generate <i>ter1Δ[25-1135]::ura4<sup>+</sup>-tk</i> strain with primers 1637, 1638, 1639, 1640 (Supplementary Table 4).                   |
| 29 pREP2 [21]              | <i>ura4<sup>+</sup>; ampR</i>                   | Used as empty plasmid control.                                                                                                                                      |
| 30 pREP42 [21]             | <i>ura4<sup>+</sup>; ampR</i>                   | Used as empty plasmid control and for cloning <i>ter1<sup>+</sup></i> .                                                                                             |
| 1245 pREP42-TER1           | <i>ura4<sup>+</sup>; ampR; ter1<sup>+</sup></i> | Primers 1826 and 1827 (Supplementary Table 4) were used to amplify <i>ter1<sup>+</sup></i> from <i>S. pombe</i> genome and inserted into BamHI digested plasmid 30. |
| 27 pREP41 [21]             | <i>LEU2; ampR</i>                               | Used to clone <i>ter1<sup>+</sup></i> gene.                                                                                                                         |
| 1241 pREP41-TER1           | <i>LEU2; ampR; ter1<sup>+</sup></i>             | Primers 1826 and 1827 (Supplementary Table 4) were used to amplify <i>ter1<sup>+</sup></i> from <i>S. pombe</i> genome and inserted into BamHI digested plasmid 27. |

**Additional fission yeast related plasmids.**

| Stock # & plasmid name | Genes                                           | Description                                                                                                     |
|------------------------|-------------------------------------------------|-----------------------------------------------------------------------------------------------------------------|
| 254 pTELO [14]         | Fission yeast telomere fragment;<br><i>ampR</i> | Carries a telomeric repeat fragment (ApaI-SacI) used in generating a telomere probe for Southern blot analysis. |

**Supplementary Table 4:** DNA primers used in this study.

| #    | Primer Name       | Primer Sequence (5' to 3')                                       | Description                                                                                                                                                             |
|------|-------------------|------------------------------------------------------------------|-------------------------------------------------------------------------------------------------------------------------------------------------------------------------|
| 1383 | Pof8-T2           | GGAAAGACAAGGTCGTGGGTGCT                                          | Anneals to <i>pof8</i> 5'UTR. Used to generate <i>pof8Δ::kanMX6</i> (sense).                                                                                            |
| 1390 | Pof8-KO(x)-B7     | GGCAAGCTAAACAGATCTGGCGCTTTACTTCGCTCC<br>TTAAAGTACGGTTTTTC        | Used to generate <i>pof8ΔkanMX6</i> strain. Red letters anneal to <i>kanMX6</i> on plasmid 7 (antisense) (Supplementary Table 3).                                       |
| 1386 | Pof8-B5           | GTGGTTCATGGTTTATTGGAATTTTTGCTG                                   | Anneals to <i>pof8</i> 3' UTR. Used to generate <i>pof8Δ::kanMX6</i> (antisense).                                                                                       |
| 1391 | Pof8-KO/tag(y)-T8 | GTCGATTTCGATACTAACGCCGCCGTTTTCTTTCTCT<br>GGTAATACTAATTTG         | Used to generate <i>pof8Δ::kanMX6</i> and 13Myc tagged <i>pof8</i> strains. Red letters anneal to pFA6a-13Myc- <i>kanMX6</i> plasmid 7 (sense) (Supplementary Table 3). |
| 1385 | Pof8-T4           | GCCCATGTATATAGACTATAGGAAGGACG                                    | Anneals to <i>pof8</i> . Used to generate 13Myc tagged <i>pof8</i> strains (sense).                                                                                     |
| 1382 | Pof8-tag(x)-B1    | GGGGATCCGTCGACCTGCAGCGTACGA<br>CATACGCCAATAATTCTTTTCTTCTCT       | Used to generate 13Myc tagged <i>pof8</i> strains. Red letters anneal to pFA6a-13Myc- <i>kanMX6</i> plasmid 7 (antisense) (Supplementary Table 3).                      |
| 1637 | TER1ΔUTK-1F       | CCACTCGGGACTTGCTTGTACTTTAACGG                                    | Used to generate <i>ter1Δ[25-1135]::ura4<sup>+</sup>-tk<sup>+</sup></i> strain. Anneals upstream of <i>ter1</i> transcript (sense).                                     |
| 1638 | TER1ΔUTK-1R       | CGGGAGATGGGGGAGGCTAACTGACCTTCTAAGCA<br>TGGGCGTTGCG               | Used to generate <i>ter1Δ[25-1135]::ura4<sup>+</sup>-tk<sup>+</sup></i> strain. Red letters anneal to plasmid 81 (antisense) (Supplementary Table 3).                   |
| 1639 | TER1ΔUTK-2F       | GGCATATCAGCAAAGACTTTCTCAGCATTAA<br>GAGCGCGTTTTAGGTTTTTTTTCAC     | Used to generate <i>ter1Δ[25-1135]::ura4<sup>+</sup>-tk<sup>+</sup></i> strain. Red letters anneal to plasmid 81 (sense) (Supplementary Table 3).                       |
| 1640 | TER1ΔUTK-2R       | GATTCATCACTTTCTCAAAATTTGAAACCGG                                  | Used to generate <i>ter1Δ[25-1135]::ura4<sup>+</sup>-tk<sup>+</sup></i> strain (antisense).                                                                             |
| 1602 | Leu1Ter1-F        | CCTGCAGCCCGGGGATCCGTAACGGAATATCCG<br>CGATGAAA                    | Used to generate <i>leu1-32::[ter1+,leu1+]</i> strain. Red letters anneal to plasmid 37 (sense) (Supplementary Table 3).                                                |
| 1636 | Leu1Ter1-R        | GGCCGCTCTAGAACTAGTGGATCCACTTCATCTCTT<br>CTAGTACGC                | Used to generate <i>leu1-32::[ter1+,leu1+]</i> strain. Red letters anneal to plasmid 37 (antisense) (Supplementary Table 3).                                            |
| 1686 | lsm3-T1           | GATGATGAAGAGACCGATAAGGAC                                         | Anneals to <i>lsm3<sup>+</sup></i> (sense).                                                                                                                             |
| 1689 | lsm3-B1           | GGATCCGTCGACCTGCAGCGTACGA<br>GGAGCAATCAAAATAACC                  | Used to generate <i>lsm3<sup>+</sup>::13Myc-kanMX6</i> strain. Red letters anneal to pFA6a-13Myc- <i>kanMX6</i> plasmid 7 (antisense) (Supplementary Table 3).          |
| 1687 | lsm3-T2           | CTGTGCGATTTCGATACTAACGCCGCCAGGAACGAATA<br>AAATTACTATACAAAGC      | Used to generate <i>lsm3<sup>+</sup>::13Myc-kanMX6</i> strain. Red letters anneal to pFA6a-13Myc- <i>kanMX6</i> plasmid 7 (sense) (Supplementary Table 3).              |
| 1690 | lsm3-B2           | CGTGAATGTTGGTTAACTTCG                                            | Anneals to <i>lsm3+</i> 3' UTR (antisense)                                                                                                                              |
| 1655 | pof8 Y330A-R      | CGTCCTCCTATAGTCTATAGCCATGGGCTCACATG<br>CAATATTC                  | Used to generate Y330A mutation (red letters) in <i>pof8</i> (antisense).                                                                                               |
| 1656 | pof8 Y330A-F      | GAATATTGCATGTGAGCCCATGGCTATAGACTATAG<br>GAAGGACG                 | Used to generate Y330A mutation (red letters) in <i>pof8</i> (sense).                                                                                                   |
| 1657 | pof8 R343A-R      | GCATGAAGCGGTGTTTTCCAAGCTATTATCGCCTCT<br>GTTTCGTCC                | Used to generate R343A mutation (red letters) in <i>pof8</i> (antisense).                                                                                               |
| 1648 | pof8Δ390-402-R    | CCGGGGATCCGTCGACCTGCAGCGTACGA<br>TAGCTCAGCAATCAGGAATGGACGGC      | Used to generate <i>pof8-Δ[390-402]-myc</i> strain. Red letters anneal to pFA6a- <i>kanMX6</i> plasmid.                                                                 |
| 1647 | pof8Δ289-402-R    | CGGGGATCCGTCGACCTGCAGCGTACGA<br>TTATCTTCATCTTTATCAGTTTG          | Used to generate <i>pof8-Δ[289-402]-myc</i> strain. Red letters anneal to pFA6a-13Myc- <i>kanMX6</i> plasmid 7 (Supplementary Table 3).                                 |
| 1285 | Tpz1-T54          | CGCGCCACTTCTAAATAAGCGAATTTCTT                                    | Used to remove 13myc tag from <i>pof8-myc</i> strains.                                                                                                                  |
| 1699 | pof8-TC           | CCTTTCCTGAAAATCGTTATCCC                                          | Anneals to <i>pof8</i> (sense).                                                                                                                                         |
| 1724 | pof8ΔMyc          | GAAATTCGCTTATTTAGAAGTGGCGCGTTACTTTTTT<br>AACATACGCCAATAATCTTTTC  | Used to remove 13myc tag from full length <i>pof8-myc</i> strains.                                                                                                      |
| 1725 | pof8Δ289Myc       | GAAATTCGCTTATTTAGAAGTGGCGCGTTAATCCAAA<br>TTATCTTCATCTTTATCAGTTTG | Used to remove 13myc tag from <i>pof8-Δ[289-402]-myc</i> strain.                                                                                                        |
| 1726 | pof8Δ390Myc       | GAAATTCGCTTATTTAGAAGTGGCGCGTTAGGTAATT<br>AGCTCAGCAATCAGGAATGGACG | Used to remove 13myc tag from <i>pof8-Δ[390-402]-myc</i> strain.                                                                                                        |



|      |                |                                                |                                                                                                                                |
|------|----------------|------------------------------------------------|--------------------------------------------------------------------------------------------------------------------------------|
| 1826 | pREPter1F      | CATATGTCGACTCTAGAGGATCCTTATACTCAACG<br>CAACGCC | Used to clone TER1 gene in pREP41 or pREP42 (Supplementary Table 3). Red sequence contains homology to plasmids 27, 29, or 30. |
| 1827 | pREPter1R      | CATTCCTTTTACCCGGGATCCACTTCATCTCTTCT<br>AGTACGC | Used to clone TER1 gene in pREP41 or pREP42 (Supplementary Table 3). Red sequence contains homology to plasmids 27, 29, or 30. |
| 637  | jk380 (TEL-#1) | TATTTCTTTATTCAACTTACCGCACTTC                   | Used in qPCR in telomere ChIP experiments [22].                                                                                |
| 638  | jk381 (TEL-#2) | CAGTAGTGCAGTGTATTATGATAATTAATG                 | Used in qPCR in telomere ChIP experiments [22].                                                                                |
| 935  | ars2004-66-F   | CGGATCCGTAATCCCAACAA                           | Used in qPCR in <i>ars2004</i> ChIP experiments [23].                                                                          |
| 936  | ars2004-66-R   | TTTGCTTACATTTTCGGAACCTTA                       | Used in qPCR in <i>ars2004</i> ChIP experiments [23].                                                                          |
| 941  | non-ARS-70-F   | TACGCGACGAACCTTGCATAT                          | Used in qPCR in <i>non-ARS</i> (~30 kb from <i>ars2004</i> ) ChIP experiments [23].                                            |
| 942  | non-ARS-70-R   | TTATCAGACCATGGAGCCCATT                         | Used in qPCR in <i>non-ARS</i> (~30 kb from <i>ars2004</i> ) ChIP experiments [23].                                            |
| 633  | Ade6-3         | TGATGGAGGACGTGAGCACATTGA                       | Used in qPCR in <i>ade6<sup>+</sup></i> ChIP experiments.                                                                      |
| 634  | Ade6-4         | TTGAATGCATCGCAGAGTTGCAGG                       | Used in qPCR in <i>ade6<sup>+</sup></i> ChIP experiments.                                                                      |
| 1779 | his1.1         | CGAAGACGTGCTTCAGCGA                            | Used in <i>his1<sup>+</sup></i> ChIP experiments, and RT and qPCR for <i>his1<sup>+</sup></i> expression studies [24].         |
| 1780 | his1.2         | TGTCCACCTCGGAATCACTG                           | Used in <i>his1<sup>+</sup></i> ChIP experiments, and RT and qPCR for <i>his1<sup>+</sup></i> expression studies [24].         |
| 1016 | 3'TER1-B1      | GATCCATGGATCTCACGTAATG                         | Used in RT for TER1.                                                                                                           |
| 1015 | 5'TER1-T1      | CAGTGACGTGAGTCTTCTGCCTT                        | Used in qPCR for TER1.                                                                                                         |
| 1017 | 275-Ter1       | CAAAAATTCGTTGTGATCTGACAAGC                     | Used in qPCR for TER1.                                                                                                         |
| 1678 | BLoli1275      | CGGAAACGGAATTCAGCATGT                          | Used in RT and qPCR for un-spliced TER1 [25].                                                                                  |
| 1679 | Bloli1020      | CAAA CAATAATGAACGTCCTG                         | Used in qPCR for un-spliced TER1 [25].                                                                                         |
| 1779 | his1.1         | CGAAGACGTGCTTCAGCGA                            | Used in RT and qPCR for <i>his1<sup>+</sup></i> [24].                                                                          |
| 1780 | his1.2         | TGTCCACCTCGGAATCACTG                           | Used in qPCR for <i>his1<sup>+</sup></i> [24].                                                                                 |
| 1772 | odT            | TTTTTTTTTTTTTTTTTTTT                           | Used in RT for polyA-TERRA/ARRET [8].                                                                                          |
| 1773 | oF1            | GAAGTTCAGTCATAATTAATTGGGTAACGGAG               | Used in qPCR for polyA-TERRA/ARRET [8].                                                                                        |
| 1775 | oR1            | GGGCCCAATAGTGGGGCATTGTATTTGTG                  | Used in qPCR for polyA-TERRA/ARRET [8].                                                                                        |
| 1774 | oF2            | GGTTGAATTGAGCGTGGTAGG                          | Used in qPCR for polyA-ARRET [8].                                                                                              |
| 1776 | oR2            | ACTTACTGCACCCTAACGCA                           | Used in qPCR for polyA-ARRET [8].                                                                                              |

**Supplementary Table 5:** Sources of sequences used in bioinformatic analysis.

| Protein Name                              | GenBank Acc. No. | Source                                                      |
|-------------------------------------------|------------------|-------------------------------------------------------------|
| Pof8                                      | BAB60688         | <i>Schizosaccharomyces pombe</i>                            |
| Pof8                                      | EPX72631         | <i>Schizosaccharomyces octosporus</i> yFS286                |
| Pof8                                      | EPY52790         | <i>Schizosaccharomyces cryophilus</i> OY26                  |
| Pof8                                      | EEB09384.1       | <i>Schizosaccharomyces japonicus</i> yFS275                 |
| LARP7                                     | NP_524795        | <i>Drosophila melanogaster</i>                              |
| LARP7                                     | NP_001039168     | <i>Xenopus tropicalis</i>                                   |
| LARP7                                     | AFE61891         | <i>Mus musculus</i>                                         |
| LARP7                                     | AAH66945         | <i>Homo sapiens</i>                                         |
| p43*                                      | AF307939         | <i>Euplotes aediculatus</i>                                 |
| p65                                       | AY280524         | <i>Tetrahymena thermophila</i>                              |
| hypothetical protein<br>G7K_2053-t1       | GAO47857         | <i>Saitoella complicata</i> NRRL Y-17804                    |
| similar to Pof8                           | CCX33746         | <i>Pyronema omphalodes</i> CBS 100304                       |
| hypothetical protein                      | XP_002836370     | <i>Tuber melanosporum</i> Mel28<br>(black truffle mushroom) |
| hypothetical protein<br>BOTBODRAFT_187311 | KDQ15495         | <i>Botryobasidium botryosum</i> FD-172 SS1                  |
| Pof8                                      | KNZ72704         | <i>Termitomyces</i> sp. J132 (mushroom)                     |

\***NOTE:** Final protein sequence surrounding open reading frameshift site was adjusted as originally proposed by Aigner *et al.* [26].

## SUPPLEMENTARY REFERENCES

1. Sievers, F. et al. Fast, scalable generation of high-quality protein multiple sequence alignments using Clustal Omega. *Mol Syst Biol* **7**, 539 (2011).
2. Singh, M. et al. Structural basis for telomerase RNA recognition and RNP assembly by the holoenzyme La family protein p65. *Mol Cell* **47**, 16-26 (2012).
3. Singh, M., Choi, C.P. & Feigon, J. xRRM: a new class of RRM found in the telomerase La family protein p65. *RNA Biol* **10**, 353-9 (2013).
4. Eichhorn, C.D., Chug, R. & Feigon, J. hLARP7 C-terminal domain contains an xRRM that binds the 3' hairpin of 7SK RNA. *Nucleic Acids Res* **44**, 9977-9989 (2016).
5. Schmidt, M.W., McQuary, P.R., Wee, S., Hofmann, K. & Wolf, D.A. F-box-directed CRL complex assembly and regulation by the CSN and CAND1. *Mol Cell* **35**, 586-97 (2009).
6. Uchikawa, E. et al. Structural insight into the mechanism of stabilization of the 7SK small nuclear RNA by LARP7. *Nucleic Acids Res* **43**, 3373-88 (2015).
7. Bah, A., Wischnewski, H., Shchepachev, V. & Azzalin, C.M. The telomeric transcriptome of *Schizosaccharomyces pombe*. *Nucleic Acids Res* **40**, 2995-3005 (2012).
8. Moravec, M. et al. TERRA promotes telomerase-mediated telomere elongation in *Schizosaccharomyces pombe*. *EMBO Rep* **17**, 999-1012 (2016).
9. Cooper, J.P., Nimmo, E.R., Allshire, R.C. & Cech, T.R. Regulation of telomere length and function by a Myb-domain protein in fission yeast. *Nature* **385**, 744-7 (1997).
10. Kanoh, J. & Ishikawa, F. spRap1 and spRif1, recruited to telomeres by Taz1, are essential for telomere function in fission yeast. *Curr Biol* **11**, 1624-30 (2001).
11. Khair, L., Subramanian, L., Moser, B.A. & Nakamura, T.M. Roles of heterochromatin and telomere proteins in regulation of fission yeast telomere recombination and telomerase recruitment. *J Biol Chem* **285**, 5327-37 (2010).
12. Webb, C.J. & Zakian, V.A. Identification and characterization of the *Schizosaccharomyces pombe* TER1 telomerase RNA. *Nat Struct Mol Biol* **15**, 34-42 (2008).
13. Moser, B.A., Subramanian, L., Khair, L., Chang, Y.T. & Nakamura, T.M. Fission yeast Tel1<sup>ATM</sup> and Rad3<sup>ATR</sup> promote telomere protection and telomerase recruitment. *PLoS Genet* **5**, e1000622 (2009).
14. Nakamura, T.M. et al. Telomerase catalytic subunit homologs from fission yeast and human. *Science* **277**, 955-9 (1997).
15. Beernink, H.T., Miller, K., Deshpande, A., Bucher, P. & Cooper, J.P. Telomere maintenance in fission yeast requires an Est1 ortholog. *Curr Biol* **13**, 575-80 (2003).
16. Nimmo, E.R., Pidoux, A.L., Perry, P.E. & Allshire, R.C. Defective meiosis in telomere-silencing mutants of *Schizosaccharomyces pombe*. *Nature* **392**, 825-8 (1998).
17. Bähler, J. et al. Heterologous modules for efficient and versatile PCR-based gene targeting in *Schizosaccharomyces pombe*. *Yeast* **14**, 943-51 (1998).
18. Krawchuk, M.D. & Wahls, W.P. High-efficiency gene targeting in *Schizosaccharomyces pombe* using a modular, PCR-based approach with long tracts of flanking homology. *Yeast* **15**, 1419-27 (1999).
19. Gadaleta, M.C., Iwasaki, O., Noguchi, C., Noma, K. & Noguchi, E. New vectors for epitope tagging and gene disruption in *Schizosaccharomyces pombe*. *Biotechniques* **55**, 257-63 (2013).
20. Sivakumar, S., Porter-Goff, M., Patel, P.K., Benoit, K. & Rhind, N. *In vivo* labeling of fission yeast DNA with thymidine and thymidine analogs. *Methods* **33**, 213-9 (2004).
21. Basi, G., Schmid, E. & Maundrell, K. TATA box mutations in the *Schizosaccharomyces pombe nmt1* promoter affect transcription efficiency but not the transcription start point or thiamine repressibility. *Gene* **123**, 131-6 (1993).
22. Kanoh, J., Sadaie, M., Urano, T. & Ishikawa, F. Telomere binding protein Taz1 establishes Swi6 heterochromatin independently of RNAi at telomeres. *Curr Biol* **15**, 1808-19 (2005).

23. Hayashi, M. et al. Genome-wide localization of pre-RC sites and identification of replication origins in fission yeast. *EMBO J* **26**, 1327-39 (2007).
24. Fujita, I., Tanaka, M. & Kanoh, J. Identification of the functional domains of the telomere protein Rap1 in *Schizosaccharomyces pombe*. *PLoS One* **7**, e49151 (2012).
25. Tang, W., Kannan, R., Blanchette, M. & Baumann, P. Telomerase RNA biogenesis involves sequential binding by Sm and Lsm complexes. *Nature* **484**, 260-4 (2012).
26. Aigner, S. et al. *Euplotes* telomerase contains an La motif protein produced by apparent translational frameshifting. *EMBO J* **19**, 6230-9 (2000).
