# Supplementary material for: LARP7-like protein Pof8 regulates telomerase assembly and poly(A)+TERRA expression in fission yeast
Source: PubMed Central journal article supplement (PMC5805695; doi:10.1038/s41467-018-02874-0), 2018-02-08
Supplement: 41467_2018_2874_MOESM3_ESM.pdf [file 41467_2018_2874_MOESM3_ESM.pdf]

## Description of Additional Supplementary Files

File Name: Supplementary Data 1

Description: Raw data and statistical analysis.
